# Supplementary material for: An efficient combination of Zr-MOF and microwave irradiation in catalytic Lewis acid Friedel–Crafts benzoylation
Source: Royal Society of Chemistry journal article supplement (doi:10.1039/c6dt00827e), 2016-01-01
Supplement: c6dt00827e1.pdf [file c6dt00827e1.pdf]

## Supporting Information

### An efficient combination of Zr-MOF and microwave irradiation in catalytic Lewis acid Friedel-Crafts benzoylation

Tan L. H. Doan,<sup>a</sup> Thong Q. Dao,<sup>a</sup> Hai N. Tran,<sup>a</sup> Phuong H. Tran,<sup>a</sup> and Thach N. Le<sup>\*a</sup>

<sup>a</sup>Faculty of Chemistry, University of Science, Viet Nam National University, Ho Chi Minh  
City, 721337 (Viet Nam)

\*To whom correspondence should be addressed: [lenthach@yahoo.com](mailto:lenthach@yahoo.com)

## Table of Contents

---

|                   |                                                      |                |
|-------------------|------------------------------------------------------|----------------|
| <b>Section S1</b> | <i>Materials</i>                                     | <b>S3</b>      |
| <b>Section S2</b> | <i>Synthesis of UiO-66 and UiO-67</i>                | <b>S4</b>      |
| <b>Section S3</b> | <i>Characterization of UiO-66, UiO-67, and VNU-1</i> | <b>S5-S10</b>  |
| <b>Section S4</b> | <i>Procedure of benzoylation reaction</i>            | <b>S11-S12</b> |
| <b>Section S5</b> | <i>NMR data and spectra</i>                          | <b>S13-S30</b> |

## Section S1: Materials

Methyl 4-iodobenzoate (purity > 97%), 1,4-diethynylbenzene (purity > 96%), bis(triphenylphosphine)palladium dichloride (purity  $\geq$  99%), copper(I) iodide (purity  $\geq$  99.5%), potassium hydroxide (purity > 90%), ammonium chloride ( $\text{NH}_4\text{Cl}$ , purity > 99.5%), sodium chloride ( $\text{NaCl}$ , purity > 99%), triethylamine (TEA, purity > 99.5%), toluene (purity > 99.8%), methanol ( $\text{MeOH}$ , purity > 99.8%), acetic acid (purity  $\geq$  99.7%), chloroform (purity > 99.5%), 1,4-benzenedicarboxylic acid ( $\text{H}_2\text{BDC}$ , purity > 98%), mesitylene (purity  $\geq$  99%), naphthalene (purity > 99%), anisole (purity > 99%), 1,2-dimethoxybenzene (purity > 99%), 1,3-dimethoxybenzene (purity  $\geq$  98%), 1,4-dimethoxybenzene (purity > 99%), 1,2,4-trimethoxybenzene (purity > 97%), ethoxybenzene (purity > 99%), 4-fluoroanisole (purity > 99%), thioanisole (purity > 99%), ethylbenzene (purity > 99.8%), *m*-xylene (purity  $\geq$  99%), anthracene (purity > 97%), fluorene (purity > 98%) and *N,N*-dimethylformamide (DMF, purity  $\geq$  99.5%) were obtained from the Sigma-Aldrich Chemical Company. Zirconyl chloride octahydrate ( $\text{ZrOCl}_2 \cdot 8\text{H}_2\text{O}$ , purity  $\geq$  98%), 1,4-biphenyldicarboxylic acid ( $\text{H}_2\text{BPDC}$ , purity > 98%), tetrahydrofuran (THF, purity > 99.5%) were obtained from Acros Organics. Benzoyl chloride (purity > 98%) was obtained from Merck. All chemicals were used without further purification.

## **Section S2: UiO-66, and UiO-67**

Synthesis of Zr-MOFs was modified from reported literature.<sup>2</sup> An equimolar solution (8.5 mM) of  $\text{ZrOCl}_2 \cdot 8\text{H}_2\text{O}$  and the dicarboxylic acid ( $\text{H}_2\text{BDC}$  or  $\text{H}_2\text{BPDC}$ ) in 40 mL solvent mixture of DMF and acetic acid ( $v/v = 39:1$ ) in 100-mL capped bottle was heated in an oven at 120 °C for 24 h under static conditions. After cooling the bottle to room temperature, the precipitates were collected by centrifugation. The products were washed with DMF for 3 days and dispersed in a large amount of chloroform for 3 days. Finally, the materials were dried under reduced pressure at 120 °C for 24 h.

### Section 3: Characterization of UiO-66, UiO-67, and VNU-1

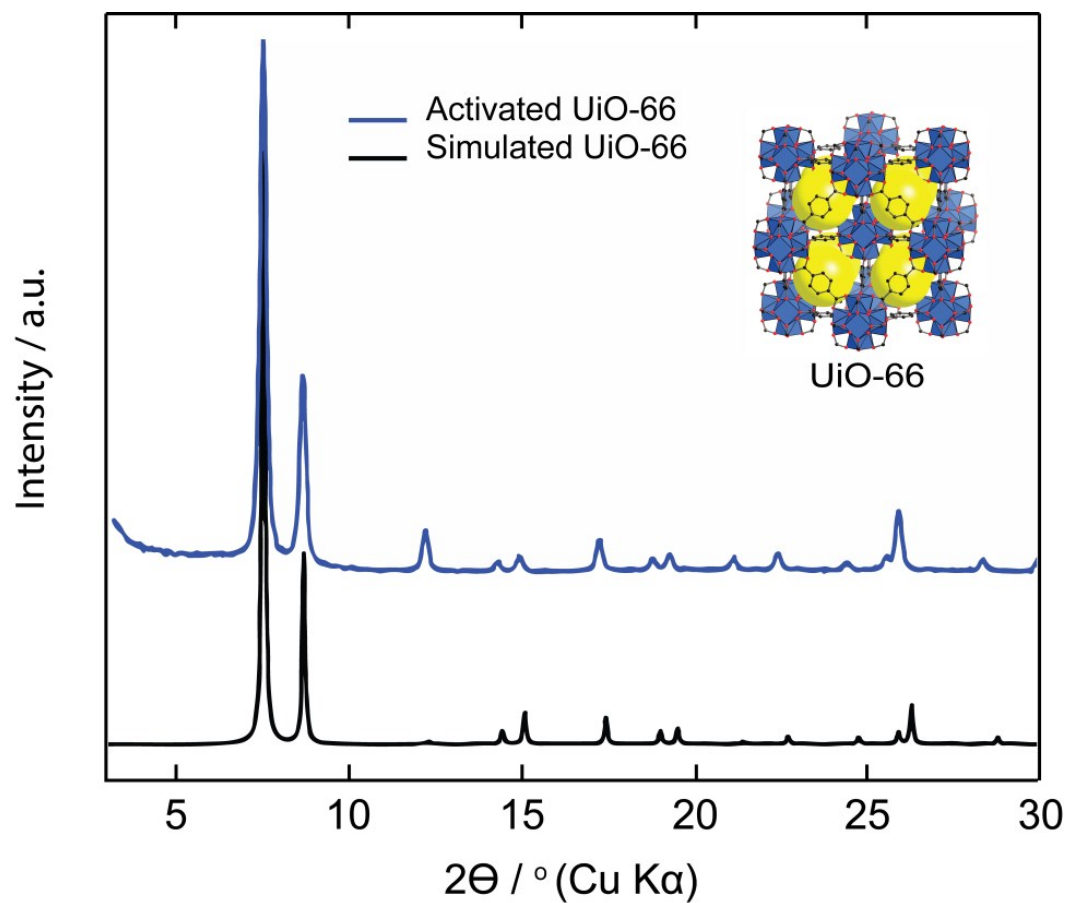

**Figure S1.** PXRD patterns of UiO-66: simulated (black) and experimental (blue). Inset: structure of UiO-66 (Zr, blue polyhedra; O, red; C, black; H atoms are omitted for clarity. The yellow colored balls represent the free pore).

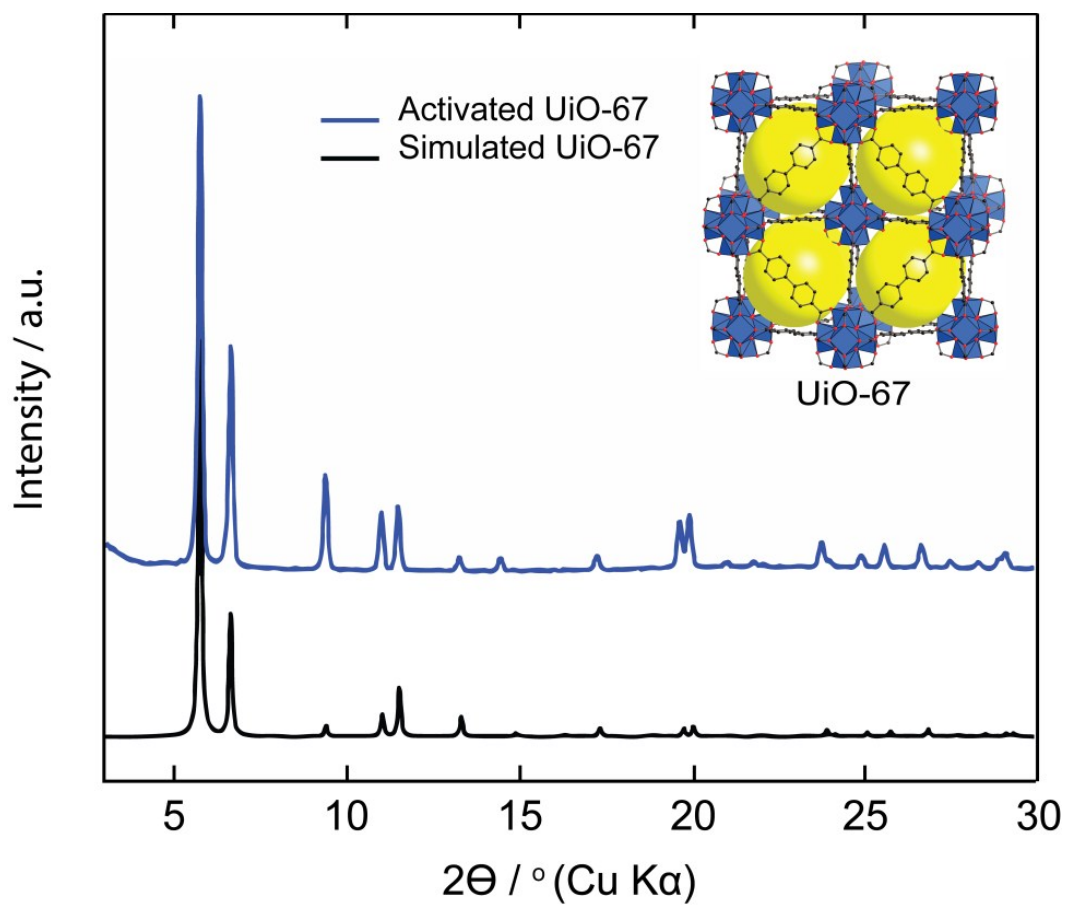

**Figure S2.** PXRD patterns of UiO-67: simulated (black) and experimental (blue). Inset: structure of UiO-67 (Zr, blue polyhedra; O, red; C, black; H atoms are omitted for clarity. The yellow colored balls represent the free pore).

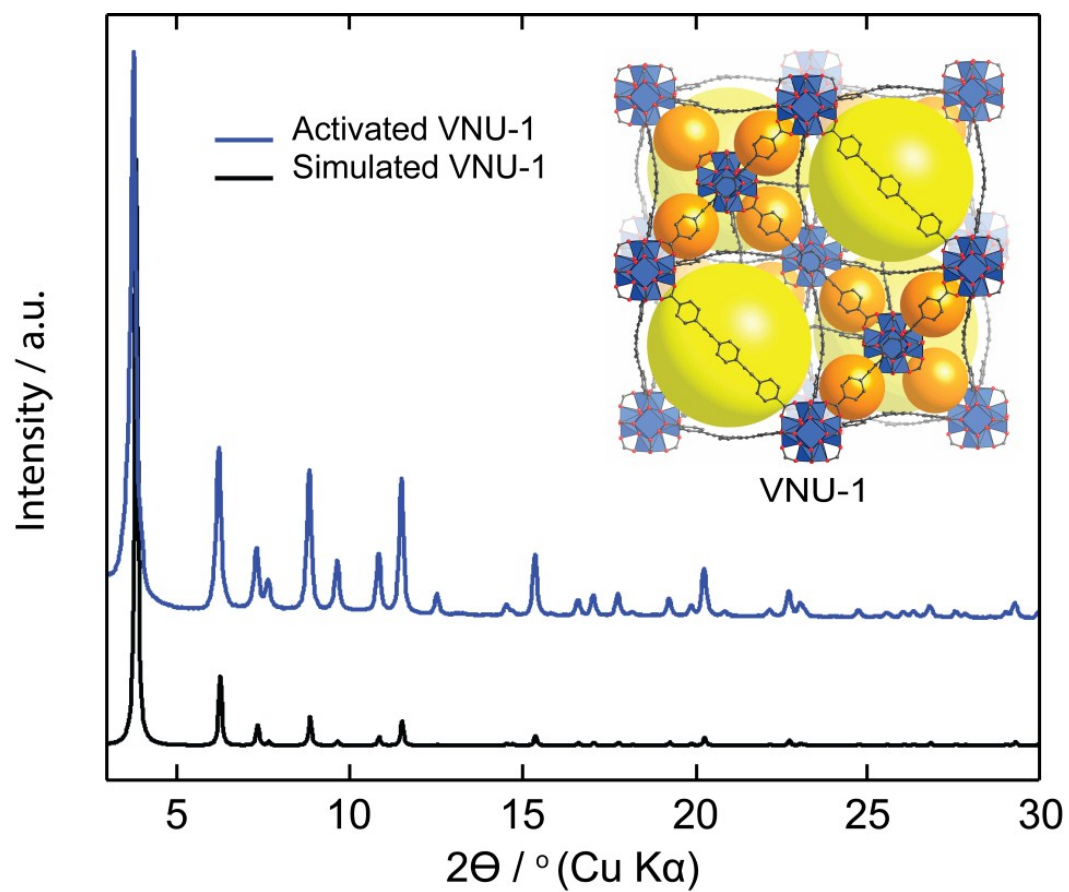

**Figure S3.** PXRD patterns of VNU-1: simulated (black) and experimental (blue). Inset: structure of VNU-1 (Zr, blue polyhedra; O, red; C, black; H atoms are omitted for clarity. The yellow and orange colored balls represent the free pore).

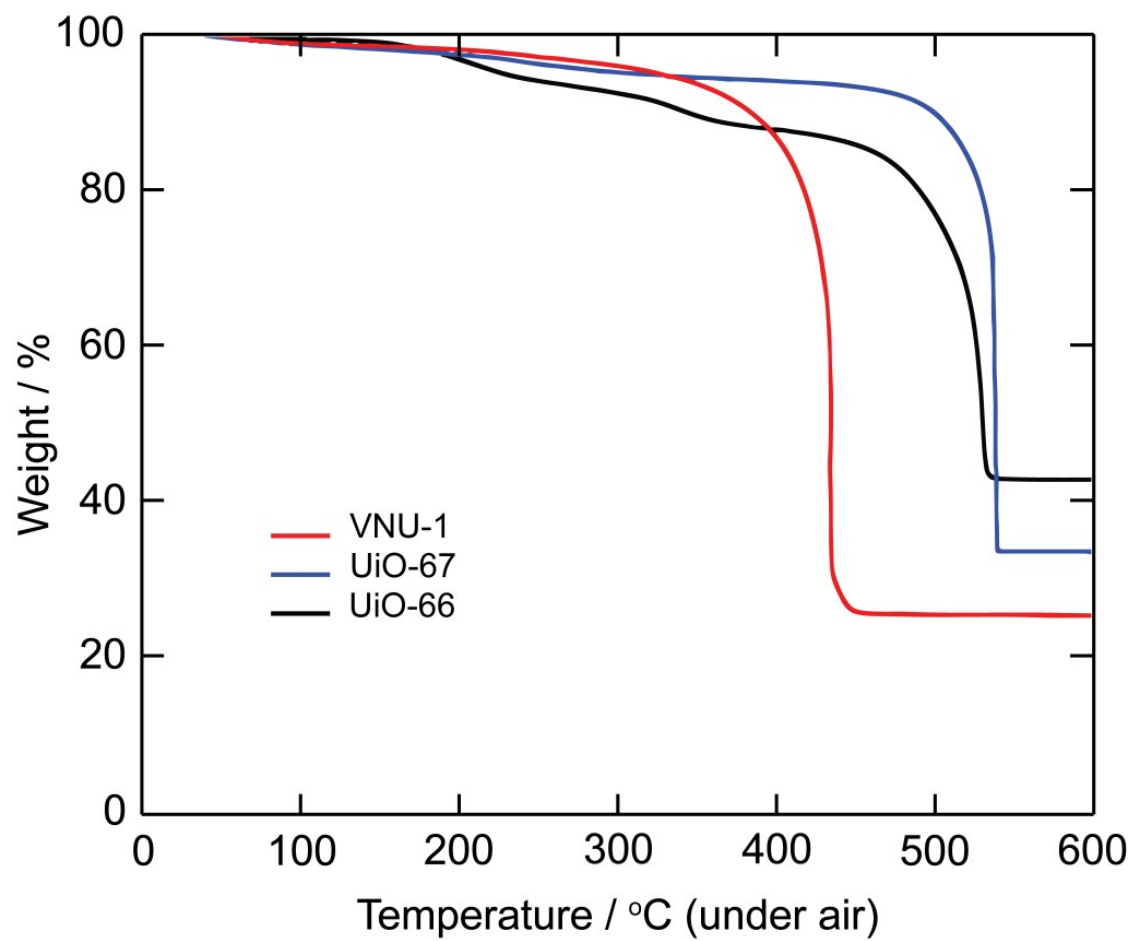

**Figure S4.** TGA curves of UiO-66 (black), UiO-67 (blue), and VNU-1 (red).

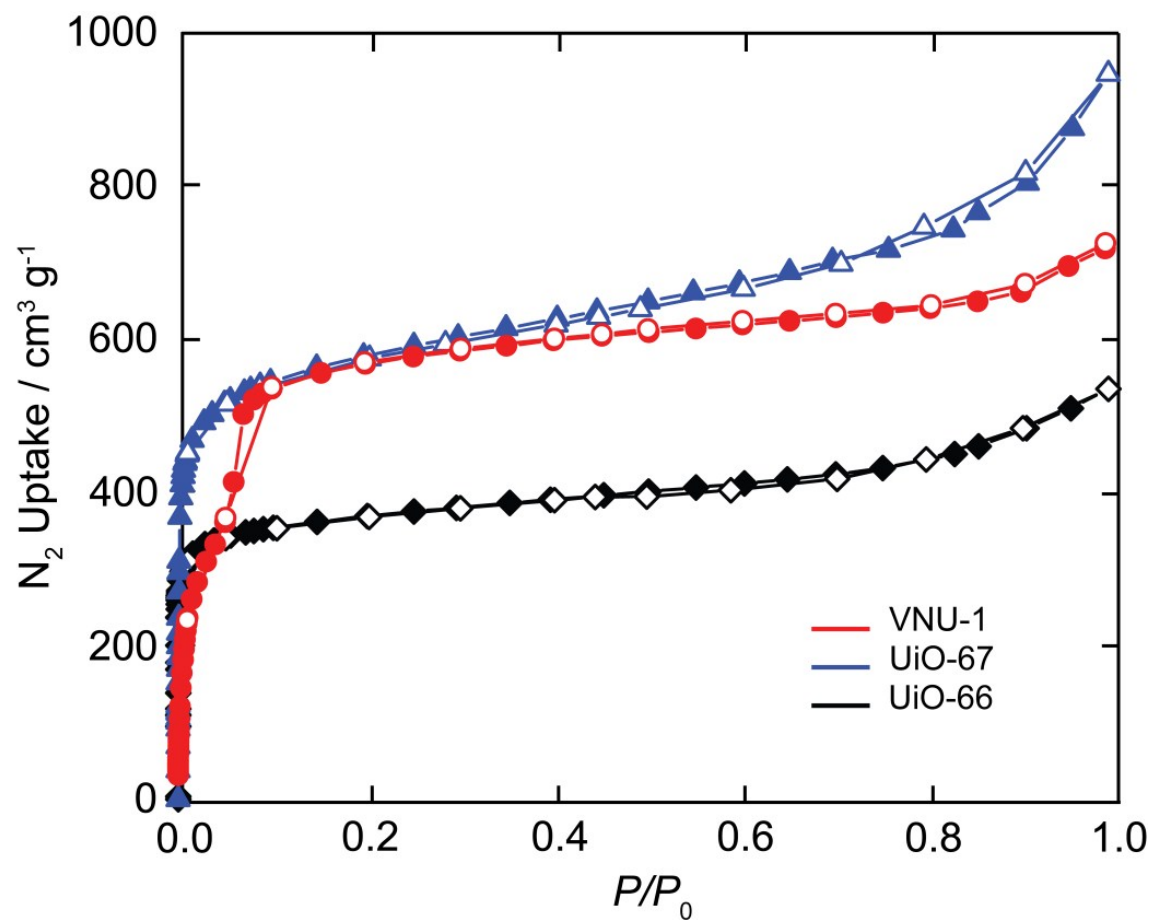

**Figure S5.** Nitrogen isotherms at 77 K of UiO-66 (black), UiO-67 (blue), and VNU-1 (red) (Closed circles, adsorption; opened circles, desorption).

### Digested $^1\text{H}$ -NMR spectrum of VNU-1

An activated sample of VNU-1 (5 mg) was digested by 20  $\mu\text{L}$  of HF (48%) and 580  $\mu\text{L}$  of  $\text{DMSO-}d_6$ . The sample was then sonicated to completely dissolve VNU-1. The signals of CPEB linker were identified in the spectrum. In addition, no signal of acetic acid as modulator was presented.

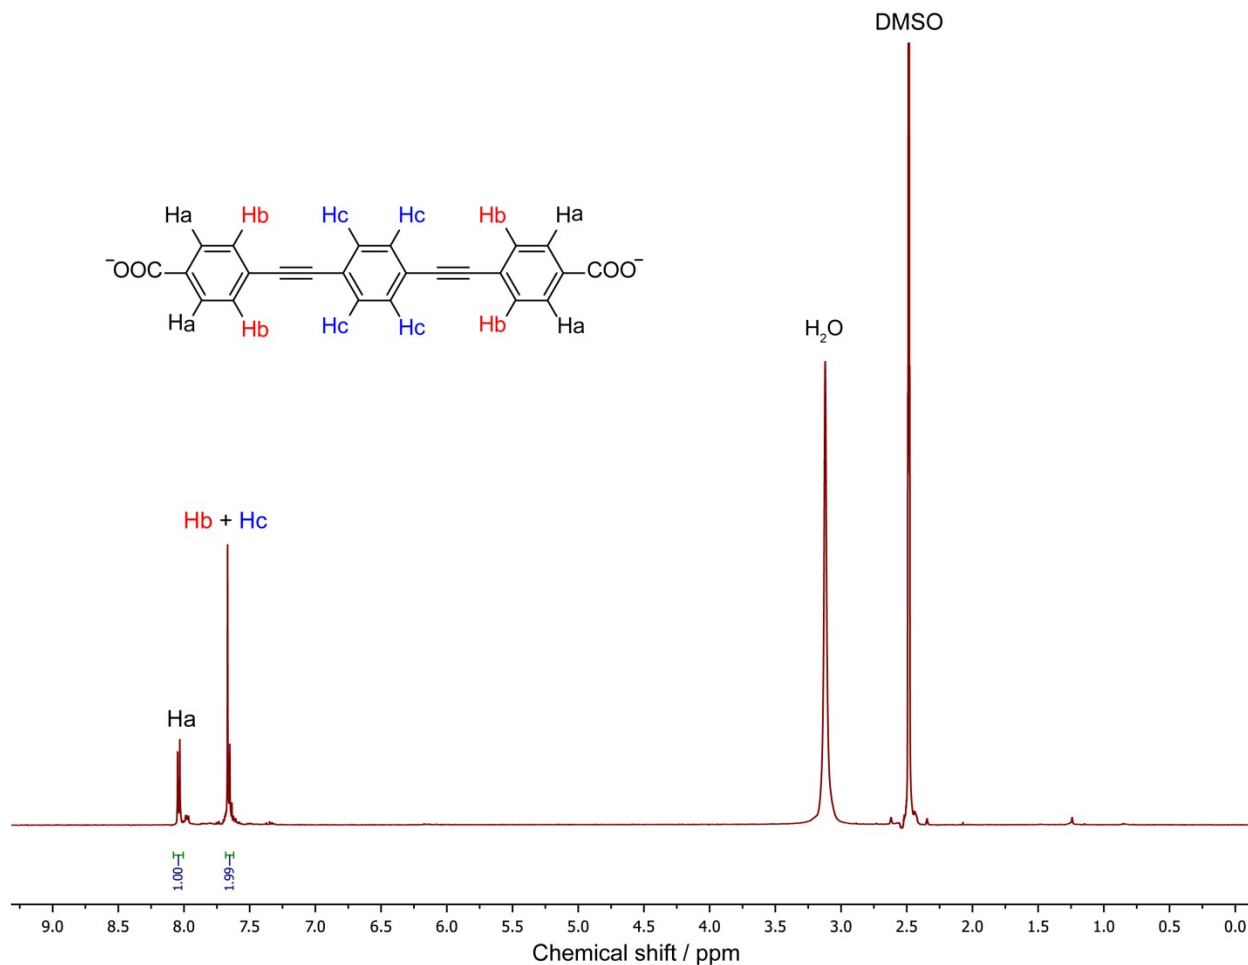

**Figure S6.** Post-digestion  $^1\text{H}$  NMR spectrum of VNU-1 displaying the presence of CPEB.

## Section 4: Procedure of benzoylation reaction

**Procedure for Zr-MOFs catalyzed Friedel-Crafts acylation of aromatic compounds.** A mixture of Zr-MOF (7.50  $\mu$ mol), arene (1.00 mmol), nitrobenzene (1 mL) and benzoyl chloride (140 mg, 1.00 mmol) was heated under microwave irradiation at 120  $^{\circ}$ C for 5 min in a CEM Discover apparatus. After being cooled, the catalyst was filtered from the reaction mixture. The filtrate was diluted with ethyl acetate (50 mL), washed with H<sub>2</sub>O (3 x 20 mL), aqueous NaHCO<sub>3</sub> (2 x 20 mL), and brine (20 mL), and dried over Na<sub>2</sub>SO<sub>4</sub>. The solvent was removed on a rotary evaporator. The crude product was purified by flash chromatography (*n*-hexane, then 10% ethyl acetate in *n*-hexane) to give corresponding product. The purity and identity of the products were confirmed by GC-MS spectra, which were compared with the spectra in the NIST library, and by <sup>1</sup>H and <sup>13</sup>C NMR spectroscopy.

**Table S1.** Optimized condition of reaction between mesitylene and benzoyl chloride catalyzed by VNU-1 under microwave irradiation.

| 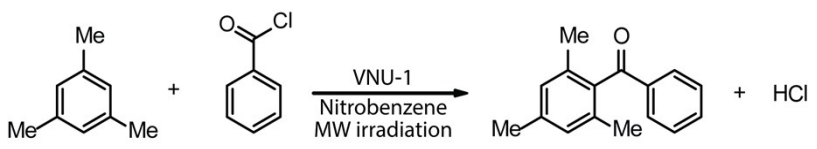 |                             |            |           |
|--------------------------------------------------------------------------------------|-----------------------------|------------|-----------|
| Entry                                                                                | Temperature ( $^{\circ}$ C) | Time (min) | Yield (%) |
| 1                                                                                    | 120                         | 1          | 40        |
| 2                                                                                    | 120                         | 3          | 72        |
| 3                                                                                    | 120                         | 5          | 94        |
| 4                                                                                    | 120                         | 10         | 94        |
| 5                                                                                    | 100                         | 5          | 67        |
| 7                                                                                    | 140                         | 5          | 93        |
| 8                                                                                    | 160                         | 5          | 90        |

**Procedure for metal halide catalyzed Friedel-Crafts acylation of aromatic compounds.**

A mixture of  $\text{ZrCl}_4$  or  $\text{ZrOCl}_2 \cdot 8\text{H}_2\text{O}$  (7.50  $\mu\text{mol}$ ), arene (1.00 mmol), nitrobenzene (1 mL) and benzoyl chloride (140 mg, 1.00 mmol) was heated under microwave irradiation at 120 °C for 5 min in a CEM Discover apparatus. After being cooled, the reaction mixture was diluted with HCl 10% (10 mL). The mixture was then extracted with ethyl acetate (3 x 15 mL), washed with, aqueous  $\text{NaHCO}_3$  (3 x 20 mL), and brine (10 mL), and dried over  $\text{Na}_2\text{SO}_4$ . The solvent was removed on a rotary evaporator. The crude product was purified by flash chromatography (*n*-hexane, then 10% ethyl acetate in *n*-hexane) to give corresponding product. The purity and identity of the products were confirmed by GC-MS spectra which were compared with the spectra in the NIST library, and by  $^1\text{H}$  and  $^{13}\text{C}$  NMR spectroscopy.

## Section 5: NMR data and spectra

### 4-Methoxybenzophenone

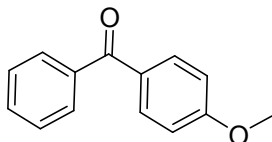

**$^1\text{H}$  NMR** (300 MHz,  $\text{CDCl}_3$ )  $\delta$  = 7.86 – 7.81 (m, 2H), 7.75 (dd,  $J$  = 8.3, 1.4 Hz, 2H), 7.55 (d,  $J$  = 7.5 Hz, 1H), 7.50-7.44 (m, 2H), 6.96 (d,  $J$  = 9.0 Hz, 2H), 3.88 (s, 3H).

**$^{13}\text{C}$  NMR** (125 MHz,  $\text{CDCl}_3$ )  $\delta$  = 195.6, 163.2, 138.3, 132.6, 131.9, 130.2, 129.8, 128.2, 113.6, 55.5.

**GC-MS** (EI, 70 eV)  $m/z$  : 212 ( $[\text{M}]^+$ )

### 3,4-Dimethoxybenzophenone

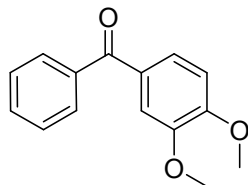

**$^1\text{H}$  NMR** (300 MHz,  $\text{CDCl}_3$ )  $\delta$  = 7.77 (dd,  $J$  = 8.4, 1.4 Hz, 2H), 7.49 (s, 1H), 7.46 – 7.36 (m, 3H), 6.90 (m, 2H), 3.96 (s, 3H), 3.95 (s, 3H).

**$^{13}\text{C}$  NMR** (75 MHz,  $\text{CDCl}_3$ )  $\delta$  = 195.6, 153.0, 149.0, 138.3, 131.9, 130.2, 129.7, 128.2, 125.5, 112.1, 109.7, 56.1, 56.1.

**GC-MS** (EI, 70 eV)  $m/z$ : 242 ( $[\text{M}]^+$ )

### 2,4-Dimethoxybenzophenone

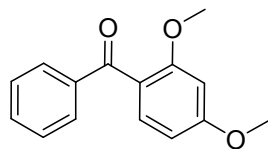

**$^1\text{H}$  NMR** (300 MHz,  $\text{CDCl}_3$ )  $\delta$  = 7.77 (dd,  $J$  = 8.4, 1.4 Hz, 2H), 7.49 (s, 1H), 7.42 (m, 1H), 7.39 (s, 2H), 6.53 (dd,  $J$  = 9.6, 5.3 Hz, 2H), 3.86 (s, 3H), 3.69 (s, 3H).

**$^{13}\text{C}$  NMR** (75 MHz,  $\text{CDCl}_3$ )  $\delta$  = 195.6, 163.4, 159.6, 138.8, 132.3, 132.2, 129.7, 128.0, 121.5, 104.6, 98.8, 55.6, 55.5.

**GC-MS** (EI, 70 eV)  $m/z$ : 242 ( $[M]^+$ ).

**2,5-Dimethoxybenzophenone**

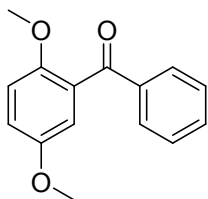

**<sup>1</sup>H NMR** (300 MHz, CDCl<sub>3</sub>):  $\delta$  = 7.84 – 7.80 (m, 2H), 7.57 – 7.52 (m, 1H), 7.47 – 7.38 (m, 2H), 7.01 (dd,  $J$  = 9.0, 3.0 Hz, 1H), 6.92 (dd,  $J$  = 6.0, 3.0 Hz, 2H), 3.78 (s, 3H), 3.66 (s, 3H).

**<sup>13</sup>C NMR** (75 MHz, CDCl<sub>3</sub>)  $\delta$  = 196.2, 153.5, 151.5, 137.6, 133.0, 129.8, 128.2, 117.3, 114.4, 113.1, 56.3, 55.8.

**GC-MS** (EI, 70 eV)  $m/z$ : 242 ( $[M]^+$ )

**2,4,5-Trimethoxybenzophenone**

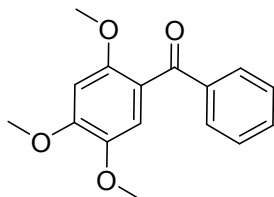

**<sup>1</sup>H NMR** (500 MHz, CDCl<sub>3</sub>)  $\delta$  = 7.76 (d,  $J$  = 8.2 Hz, 2H), 7.51 (t,  $J$  = 6.8 Hz, 1H), 7.40 (t,  $J$  = 7.6 Hz, 2H), 7.02 (s, 1H), 6.55 (s, 1H), 3.94 (s, 3H), 3.83 (s, 3H), 3.64 (s, 3H).

**<sup>13</sup>C NMR** (125 MHz, CDCl<sub>3</sub>)  $\delta$  = 195.5, 153.4, 152.7, 143.3, 139.0, 132.3, 129.5, 128.0, 120.1, 113.6, 97.7, 56.7, 56.5, 56.2.

**GC-MS** (EI, 70 eV)  $m/z$ : 272 ( $[M]^+$ ).

**4-Ethoxybenzophenone**

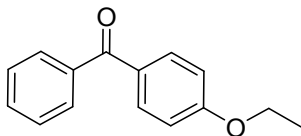

**<sup>1</sup>H NMR** (500 MHz, CDCl<sub>3</sub>)  $\delta$  = 7.81 (d,  $J$  = 8.9 Hz, 2H), 7.75 (dd,  $J$  = 8.3, 1.3 Hz, 2H), 7.55 (t,  $J$  = 6.8 Hz, 1H), 7.47 (d,  $J$  = 7.7 Hz, 2H), 6.94 (d,  $J$  = 8.9 Hz, 2H), 4.12 (q,  $J$  = 7.0 Hz, 2H), 1.45 (t,  $J$  = 7.0 Hz, 3H).

**$^{13}\text{C}$  NMR** (125 MHz,  $\text{CDCl}_3$ )  $\delta$  = 195.6, 162.7, 138.4, 132.6, 131.8, 130.0, 129.7, 128.2, 114.0, 63.8, 14.7.

**GC-MS** (EI, 70 eV)  $m/z$ : 226 ( $[\text{M}]^+$ ).

#### 4-Methylthiobenzophenone

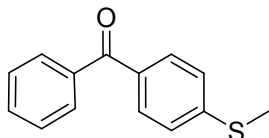

**$^1\text{H}$  NMR** (500 MHz,  $\text{CDCl}_3$ )  $\delta$  = 7.75 (m, 4H), 7.57 (t,  $J$  = 7.4 Hz, 1H), 7.47 (t,  $J$  = 7.6 Hz, 2H), 7.31 – 7.27 (m, 2H), 2.53 (s, 3H).

**$^{13}\text{C}$  NMR** (125 MHz,  $\text{CDCl}_3$ )  $\delta$  = 195.8, 145.3, 137.9, 133.7, 132.2, 130.6, 129.8, 128.3, 124.9, 14.9.

**GC-MS** (EI, 70 eV)  $m/z$ : 228 ( $[\text{M}]^+$ ).

#### 4-Ethylbenzophenone

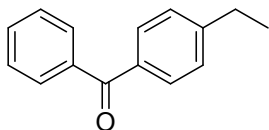

**$^1\text{H}$  NMR** (500 MHz,  $\text{CDCl}_3$ )  $\delta$  = 7.78 (dd,  $J$  = 8.3, 1.3 Hz, 2H), 7.76 – 7.72 (m, 2H), 7.56 (s, 1H), 7.46 (t,  $J$  = 7.6 Hz, 2H), 7.30 (d,  $J$  = 8.4 Hz, 2H), 2.73 (q,  $J$  = 7.6 Hz, 2H), 1.28 (t,  $J$  = 7.6 Hz, 3H).

**$^{13}\text{C}$  NMR** (125 MHz,  $\text{CDCl}_3$ )  $\delta$  = 196.5, 149.4, 138.0, 135.2, 132.1, 130.3, 130.1, 130.0, 129.9, 128.4, 128.2, 127.8, 28.9, 15.2.

**GC-MS** (EI, 70 eV)  $m/z$ : 210 ( $[\text{M}]^+$ ).

#### 2,4-Dimethylbenzophenone

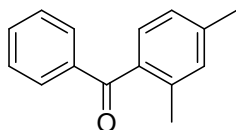

**$^1\text{H}$  NMR** (500 MHz,  $\text{CDCl}_3$ )  $\delta$  = 7.77 (dd,  $J$  = 8.3, 1.2 Hz, 2H), 7.54 (t,  $J$  = 7.4 Hz, 1H), 7.42 (m, 2H), 7.21 (d,  $J$  = 7.7 Hz, 1H), 7.09 (s, 1H), 7.02 (d,  $J$  = 7.7 Hz, 1H), 2.36 (s, 3H), 2.31 (s, 3H).

**$^{13}\text{C}$  NMR** (125 MHz,  $\text{CDCl}_3$ )  $\delta$  = 198.5, 140.6, 138.3, 137.3, 135.7, 132.8, 131.9, 130.1, 129.2, 128.4, 127.5, 125.8, 21.4, 20.1.

**GC-MS** (EI, 70 eV)  $m/z$ : 209 ( $[M - H]^+$ ).

### 2,4,6-Trimethylbenzophenone

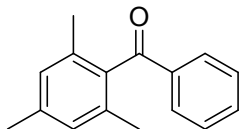

**$^1\text{H}$  NMR** (500 MHz,  $\text{CDCl}_3$ )  $\delta$  = 7.80 (d,  $J$  = 7.2 Hz, 2H), 7.57 (t,  $J$  = 7.4 Hz, 1H), 7.44 (t,  $J$  = 7.8 Hz, 2H), 6.90 (s, 2H), 2.33 (s, 3H), 2.08 (s, 6H).

**$^{13}\text{C}$  NMR** (125 MHz,  $\text{CDCl}_3$ )  $\delta$  = 200.8, 138.5, 137.4, 136.9, 134.2, 133.5, 129.4, 128.8, 128.4, 21.2, 19.4.

**GC-MS** (EI, 70 eV)  $m/z$ : 223 (100  $[M+H]^+$ ).

### 1-Benzoylnaphthalene

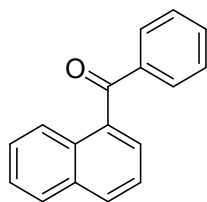

**$^1\text{H}$  NMR** (500 MHz,  $\text{CDCl}_3$ )  $\delta$  = 8.09 (d,  $J$  = 9.1 Hz, 1H), 8.01 (d,  $J$  = 8.2 Hz, 1H), 7.93 (d,  $J$  = 7.3 Hz, 1H), 7.87 (dd,  $J$  = 8.4, 1.3 Hz, 2H), 7.64 – 7.56 (m, 2H), 7.57 – 7.49 (m, 3H), 7.46 (dd,  $J$  = 8.0, 7.5 Hz, 2H).

**$^{13}\text{C}$  NMR** (125 MHz,  $\text{CDCl}_3$ )  $\delta$  = 196.9, 138.1, 135.4, 135.0, 132.5, 132.4, 132.0, 130.3, 129.6, 128.5, 128.5, 128.5, 128.0, 127.0, 125.9.

**GC-MS** (EI, 70 eV)  $m/z$ : 232 ( $[M]^+$ )

### 2-Benzoylnaphthalene

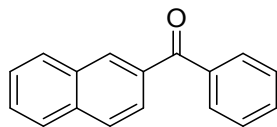

**$^1\text{H}$  NMR** (500 MHz,  $\text{CDCl}_3$ )  $\delta$  = 8.27 (s, 1H), 7.95 (d,  $J$  = 1.1 Hz, 2H), 7.94 – 7.89 (m, 2H), 7.89 – 7.83 (m, 2H), 7.62 (d,  $J$  = 3.8 Hz, 2H), 7.53 (dd,  $J$  = 17.0, 9.2 Hz, 3H).

**$^{13}\text{C}$  NMR** (125 MHz,  $\text{CDCl}_3$ )  $\delta$  = 198.2, 138.5, 136.5, 133.9, 133.4, 131.4, 131.1, 130.6, 128.6, 128.5, 127.9, 127.4, 126.6, 125.8, 124.5.

**GC-MS** (EI, 70 eV)  $m/z$ : 232 ( $[\text{M}]^+$ ).

### 2-Benzoylfluorene

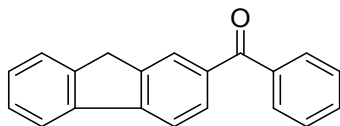

**$^1\text{H}$  NMR** (500 MHz,  $\text{CDCl}_3$ )  $\delta$  = 8.03 (s, 1H), 7.89 – 7.82 (m, 5H), 7.59 (dd,  $J$  = 6.8, 5.2 Hz, 2H), 7.51 (t,  $J$  = 7.6 Hz, 2H), 7.45 – 7.36 (m, 2H), 3.95 (s, 2H).

**$^{13}\text{C}$  NMR** (125 MHz,  $\text{CDCl}_3$ )  $\delta$  = 196.7, 146.0, 144.5, 143.1, 140.6, 138.3, 135.9, 132.2, 130.0, 129.7, 128.3, 128.0, 127.1, 126.8, 125.3, 120.9, 119.4, 36.9.

**GC-MS** (EI, 70 eV)  $m/z$ : 270 ( $[\text{M}]^+$ ).

### 9-Benzoylanthracene

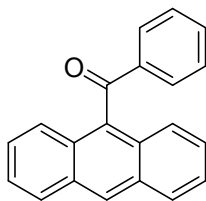

**$^1\text{H}$  NMR** (500 MHz,  $\text{CDCl}_3$ )  $\delta$  = 8.57 (s, 1H), 8.07 (d,  $J$  = 8.5 Hz, 2H), 7.83 (d,  $J$  = 7.4 Hz, 2H), 7.73 (dd,  $J$  = 8.7, 0.5 Hz, 2H), 7.58 (t,  $J$  = 7.4 Hz, 1H), 7.53 – 7.44 (m, 2H), 7.40 (td,  $J$  = 8.1, 4.3 Hz, 4H).

**$^{13}\text{C}$  NMR** (125 MHz,  $\text{CDCl}_3$ )  $\delta$  = 200.2, 138.2, 134.0, 131.1, 130.1, 128.9, 128.7, 128.4, 126.6, 125.5, 125.3.

**GC-MS** (EI, 70 eV)  $m/z$ : 282 ( $[\text{M}]^+$ ).

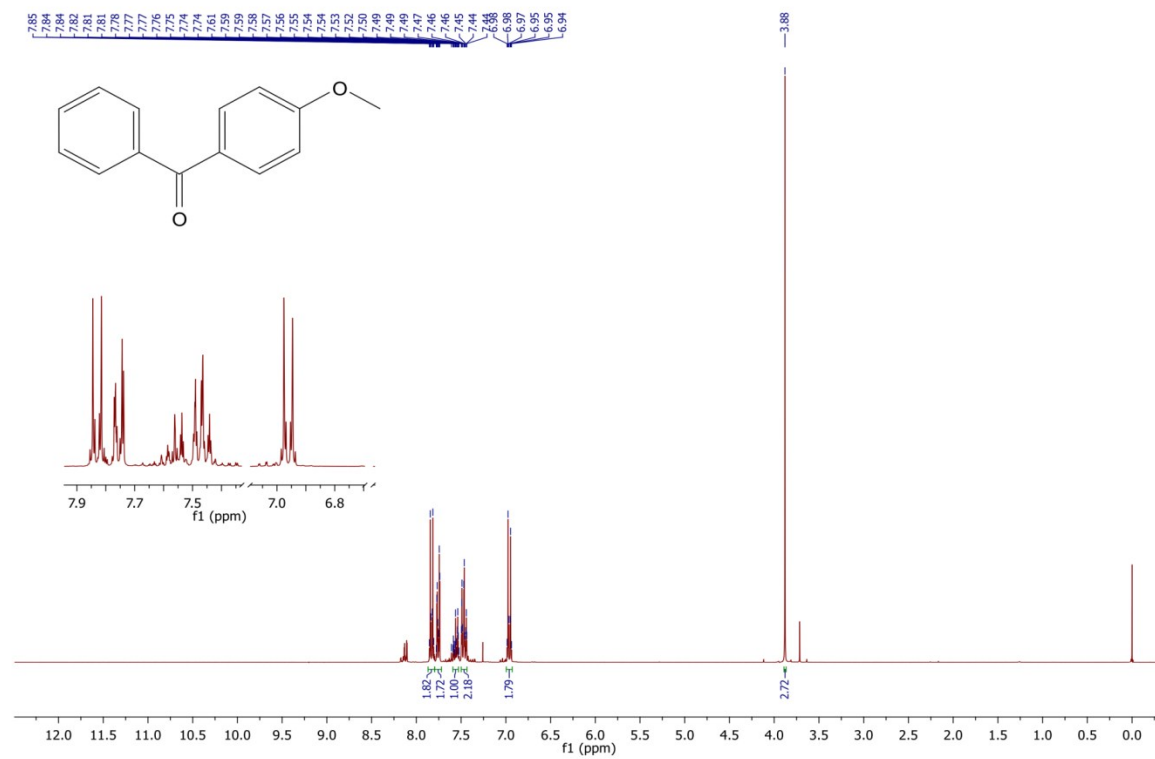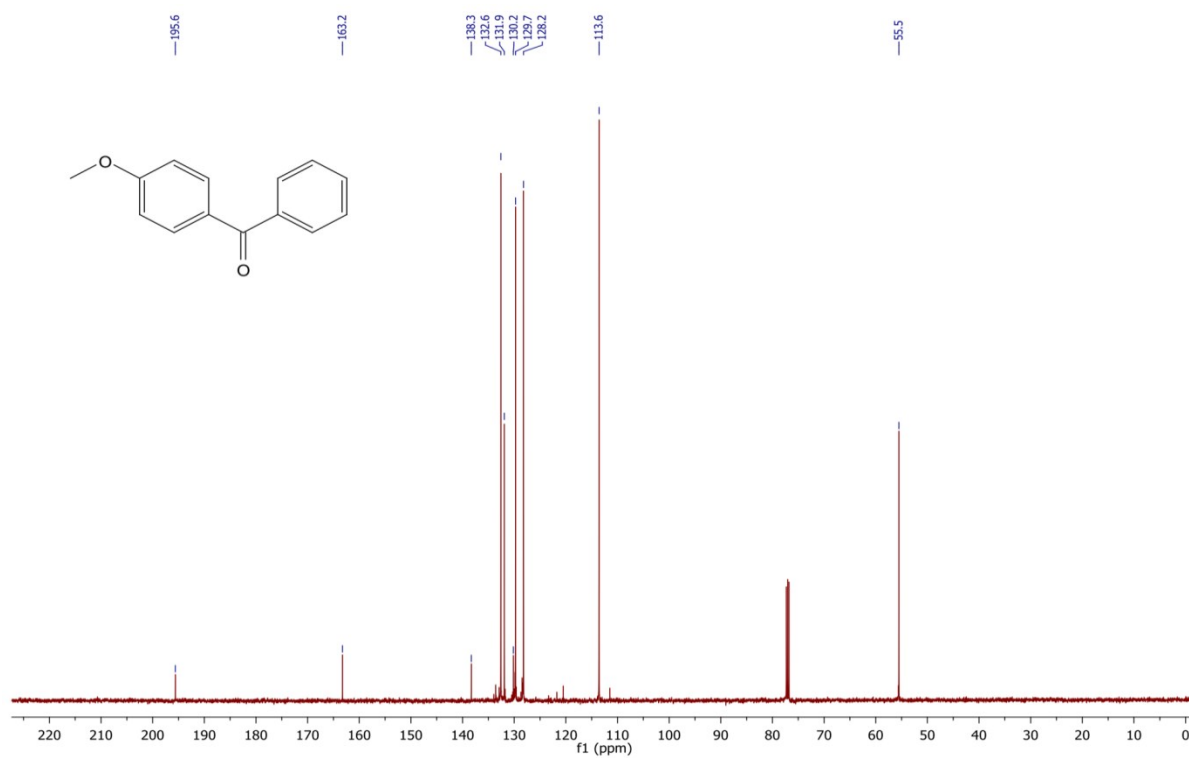

**Figure S7.** <sup>1</sup>H and <sup>13</sup>C NMR of 4-methoxybenzophenone.

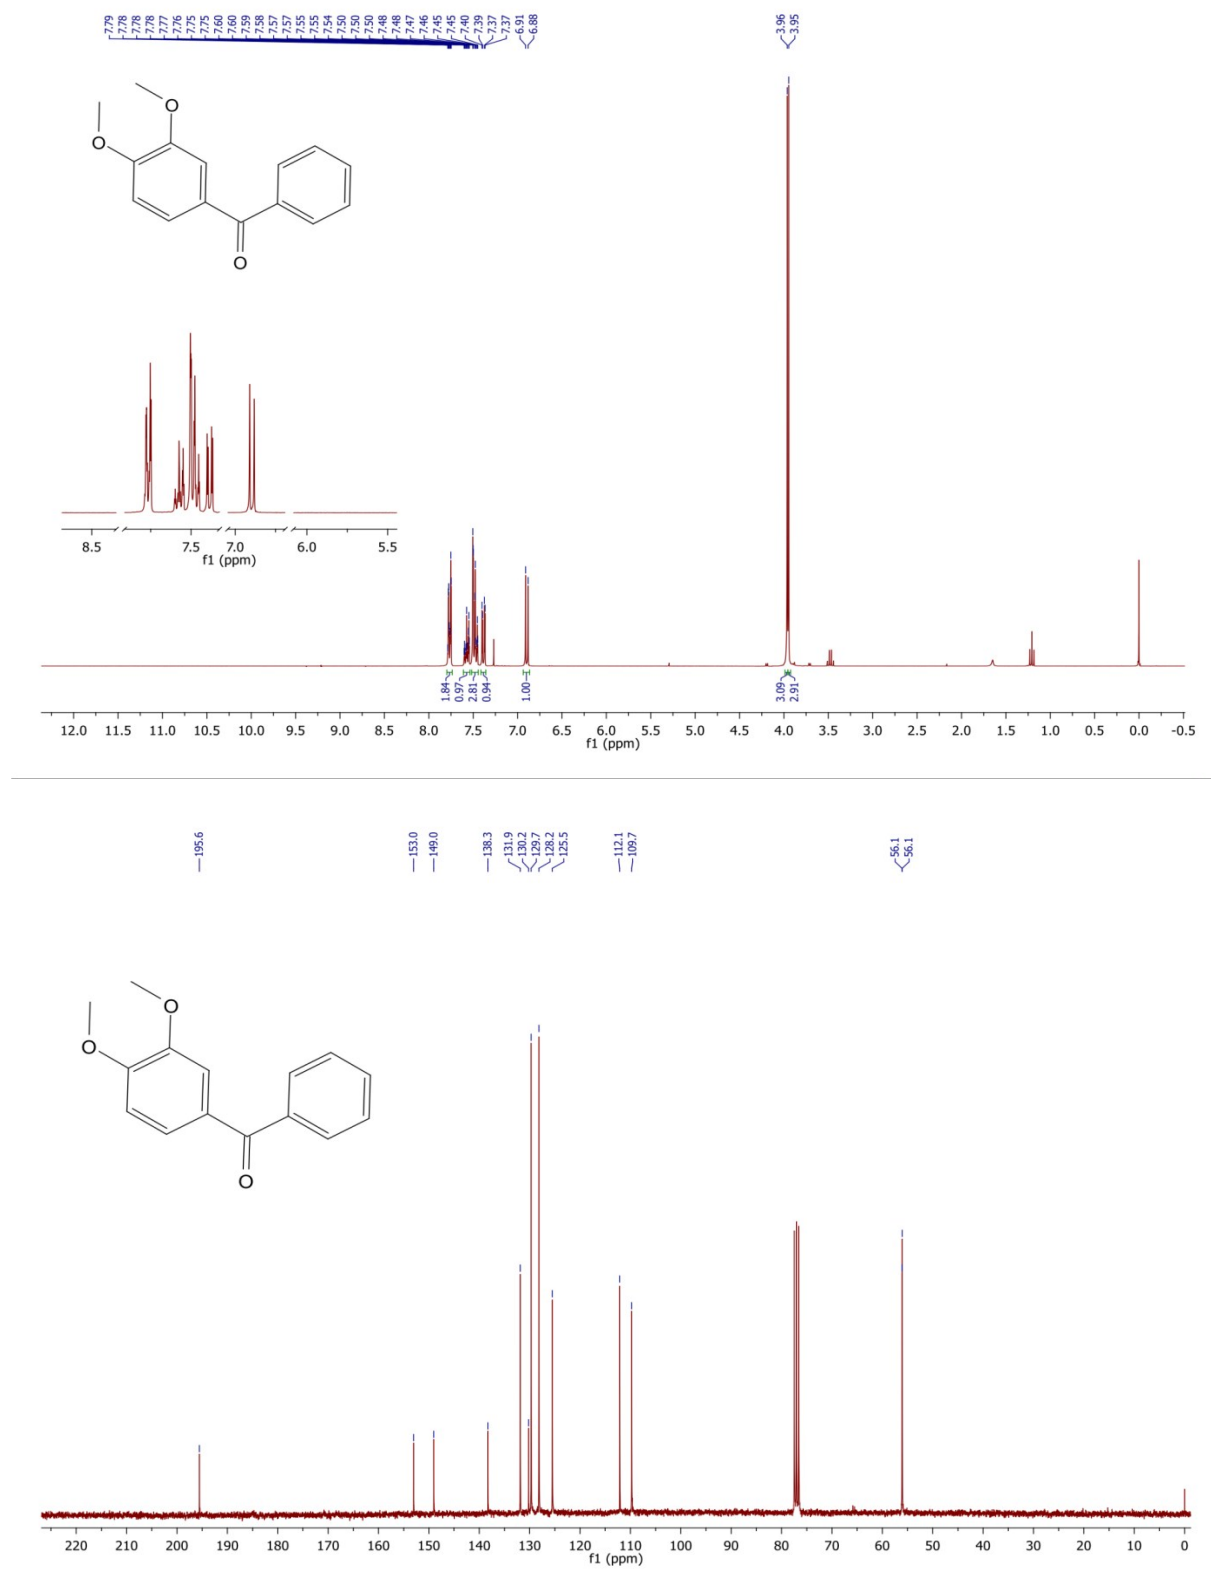

**Figure S8.**  $^1\text{H}$  and  $^{13}\text{C}$  NMR of 3,4-dimethoxybenzophenone.

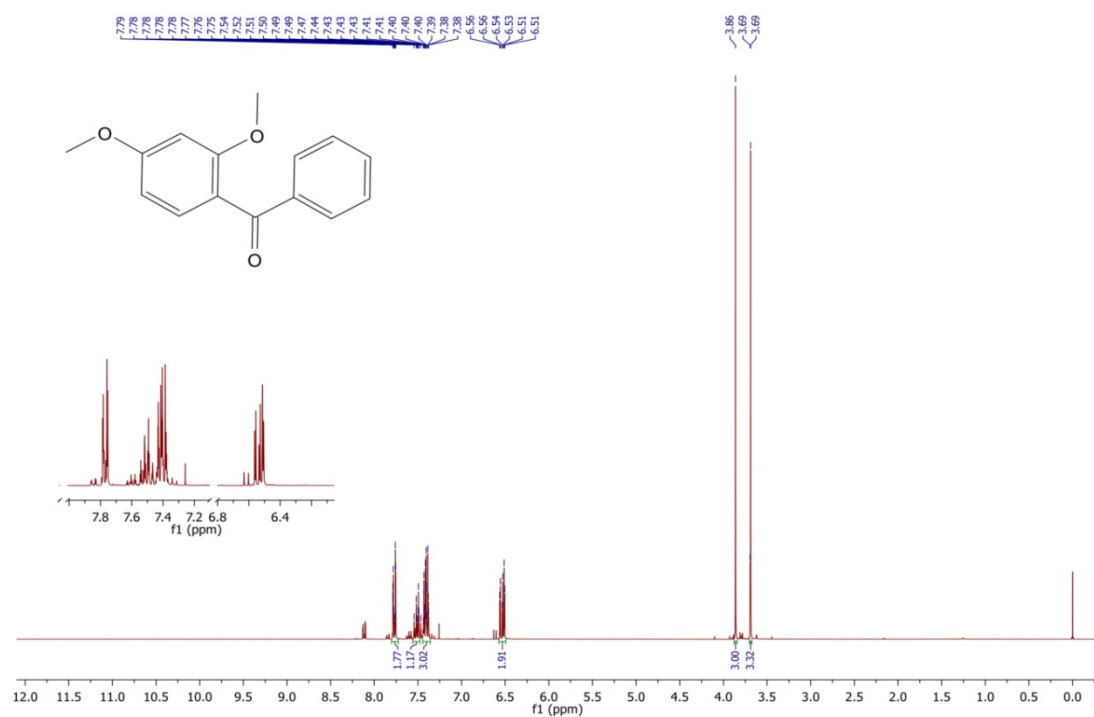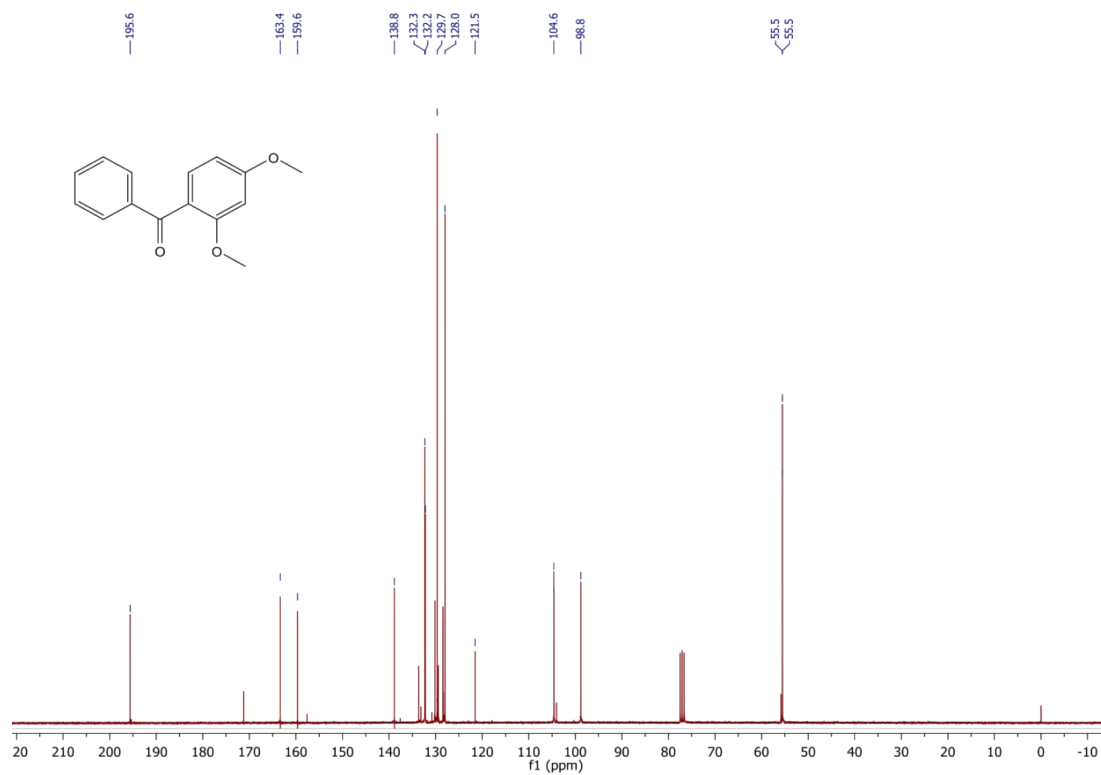

**Figure S9.** <sup>1</sup>H and <sup>13</sup>C NMR of 2,4-dimethoxybenzophenone.

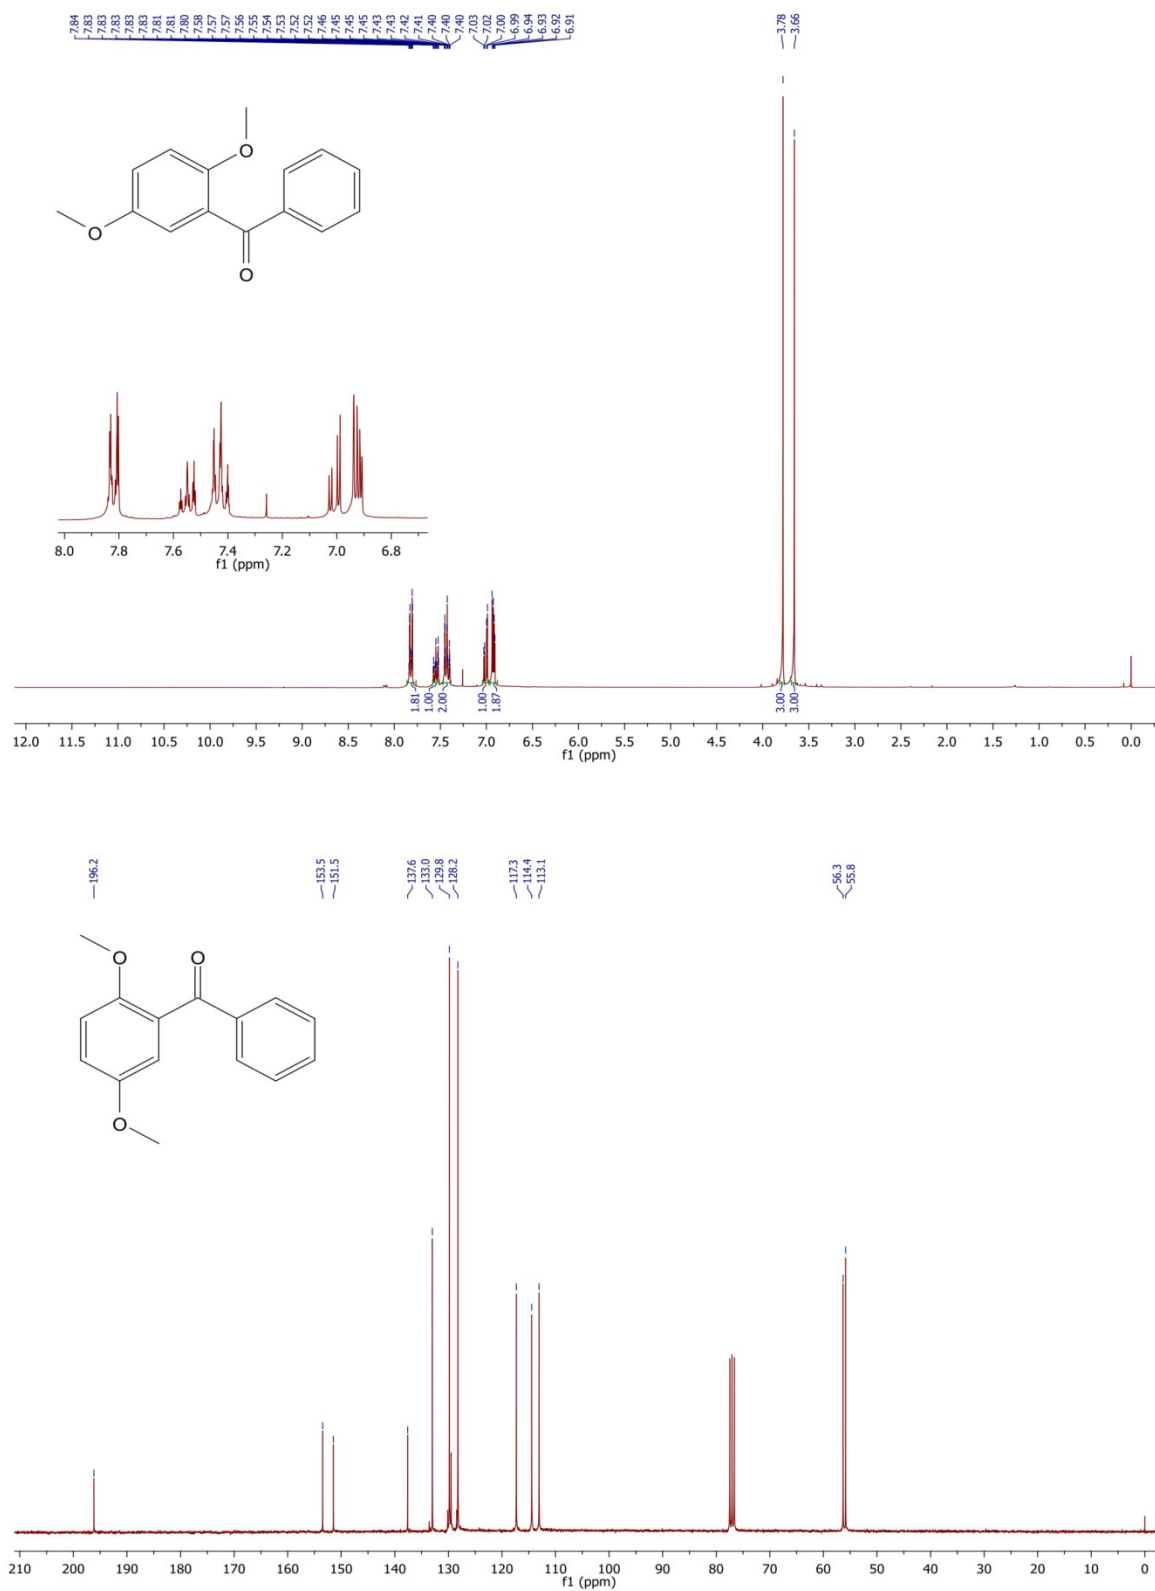

**Figure S10.** <sup>1</sup>H and <sup>13</sup>C NMR of 2,5-dimethoxybenzophenone.

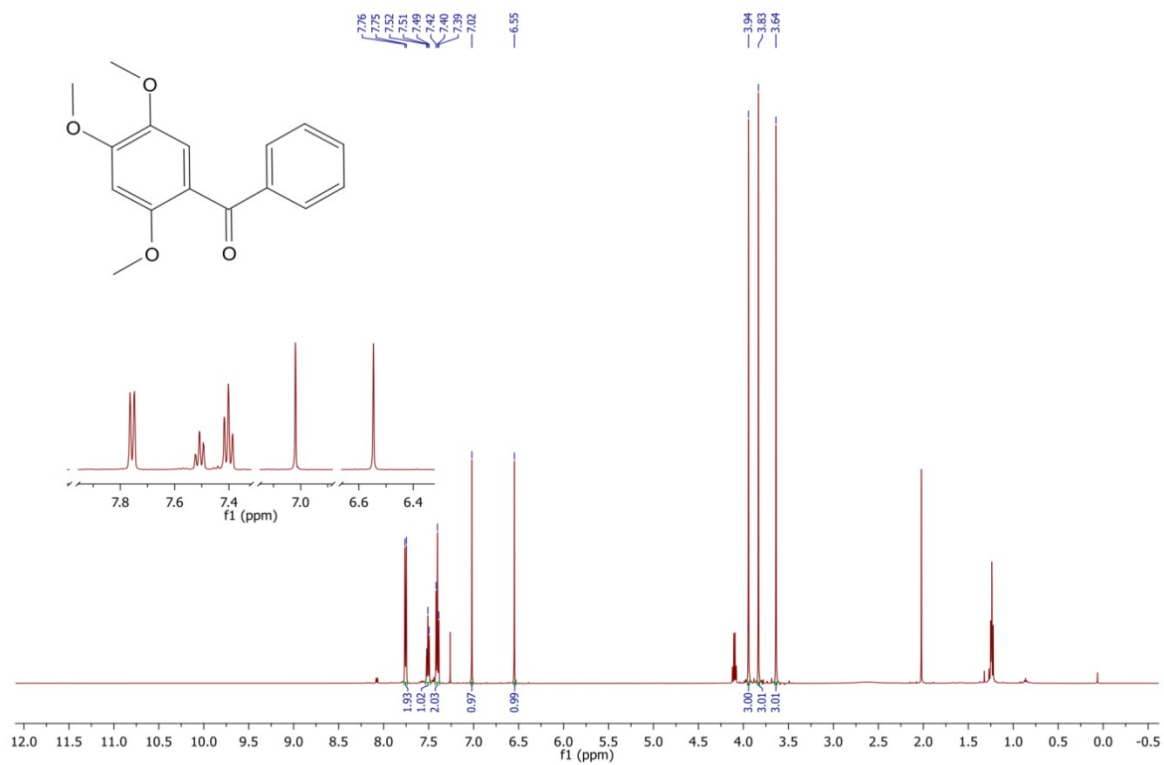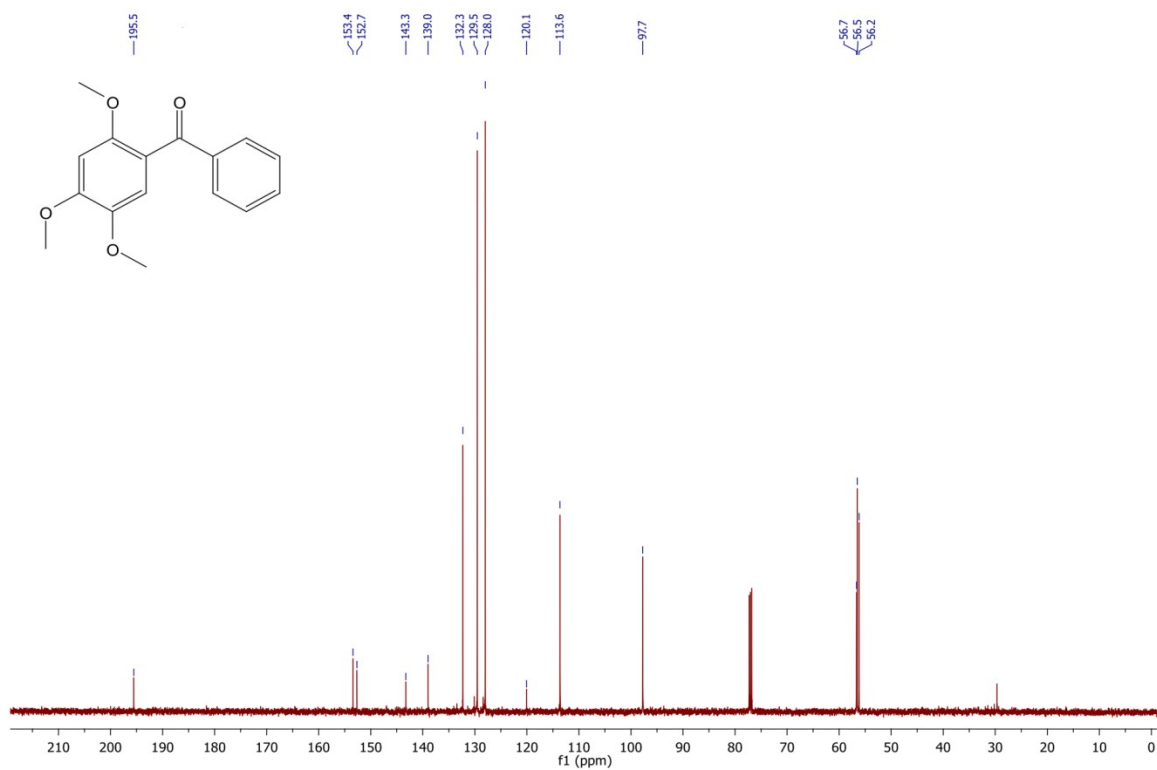

**Figure S11.** <sup>1</sup>H and <sup>13</sup>C NMR of 2,4,5-trimethoxybenzophenone.

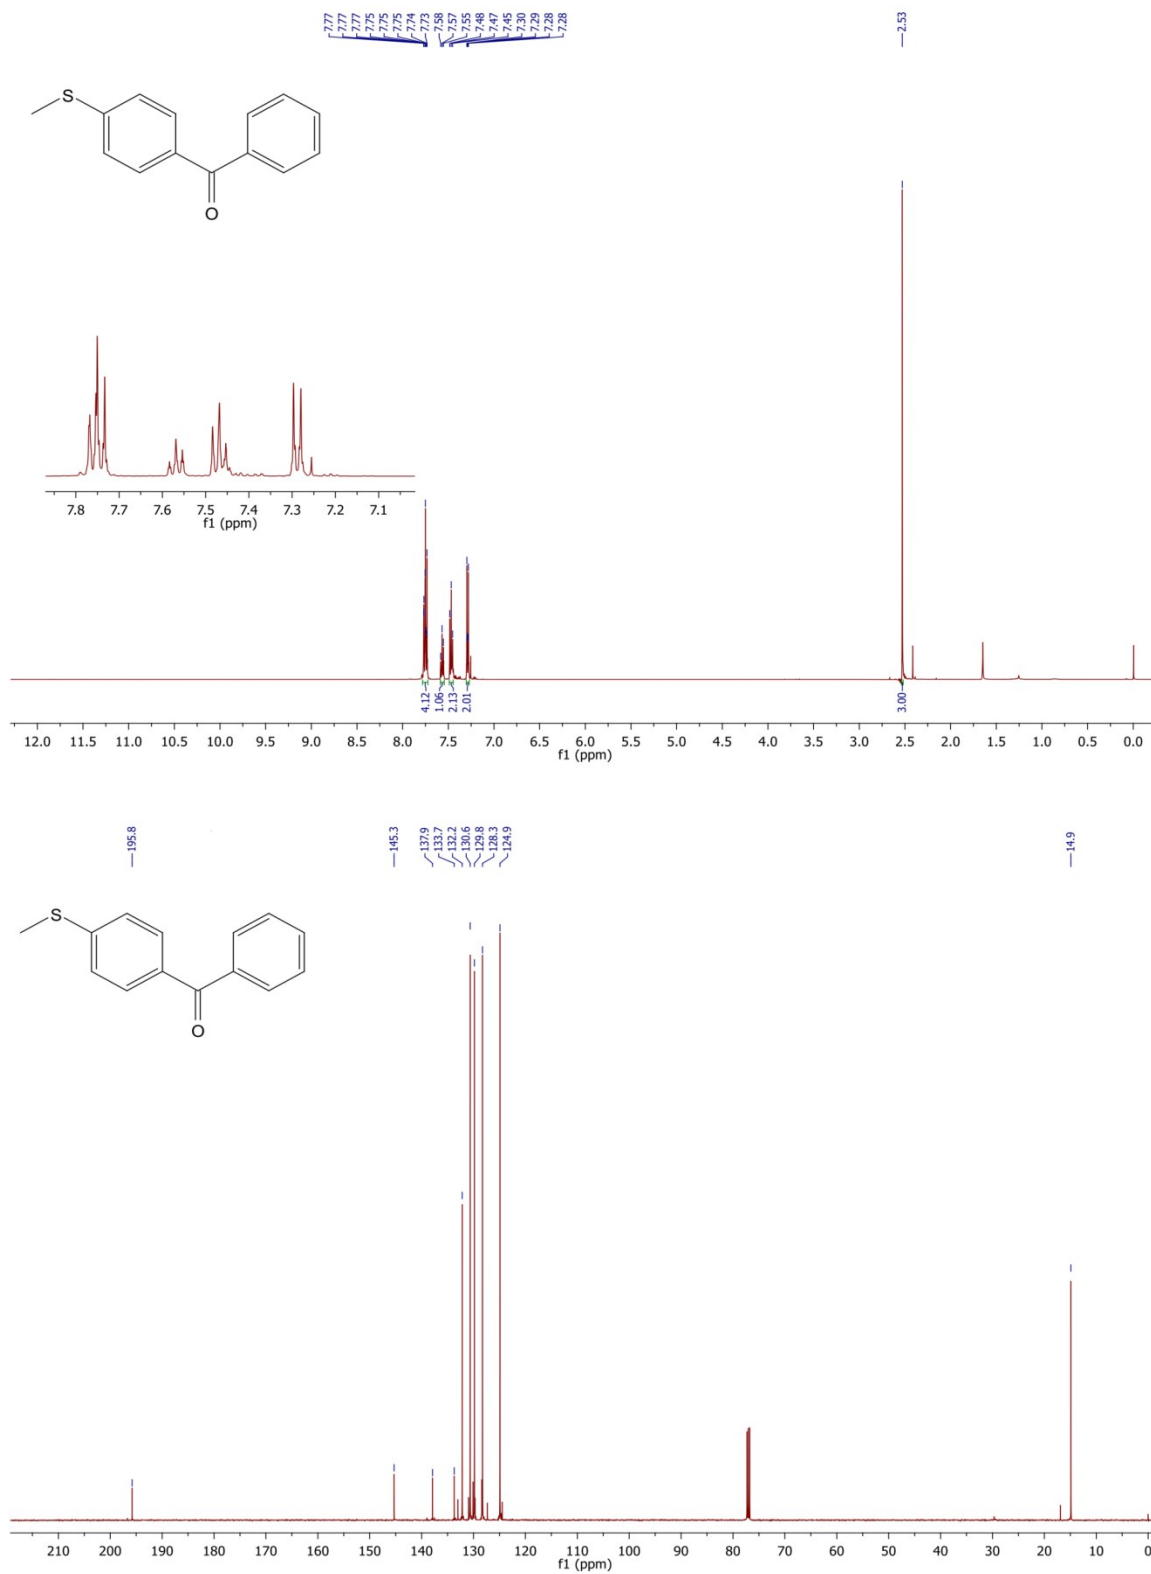

**Figure S12.**  $^1\text{H}$  and  $^{13}\text{C}$  NMR of 4-methylthiobenzophenone.

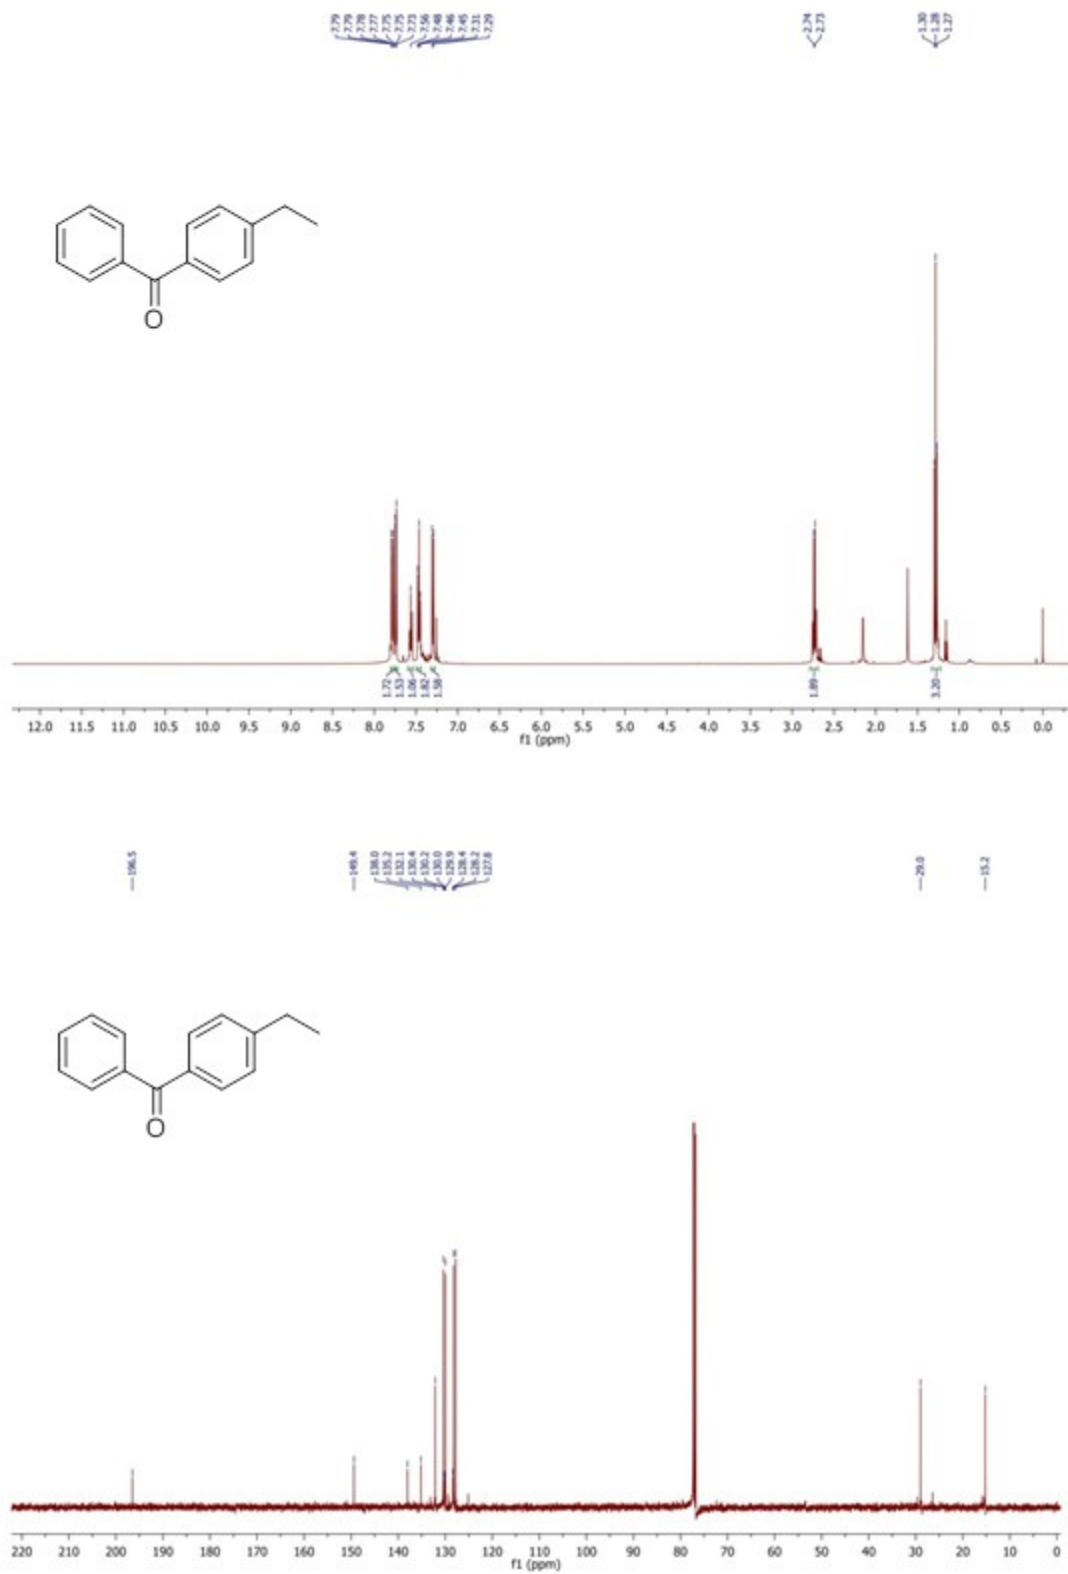

**Figure S13.**  $^1\text{H}$  and  $^{13}\text{C}$  NMR of 4-ethylbenzophenone.



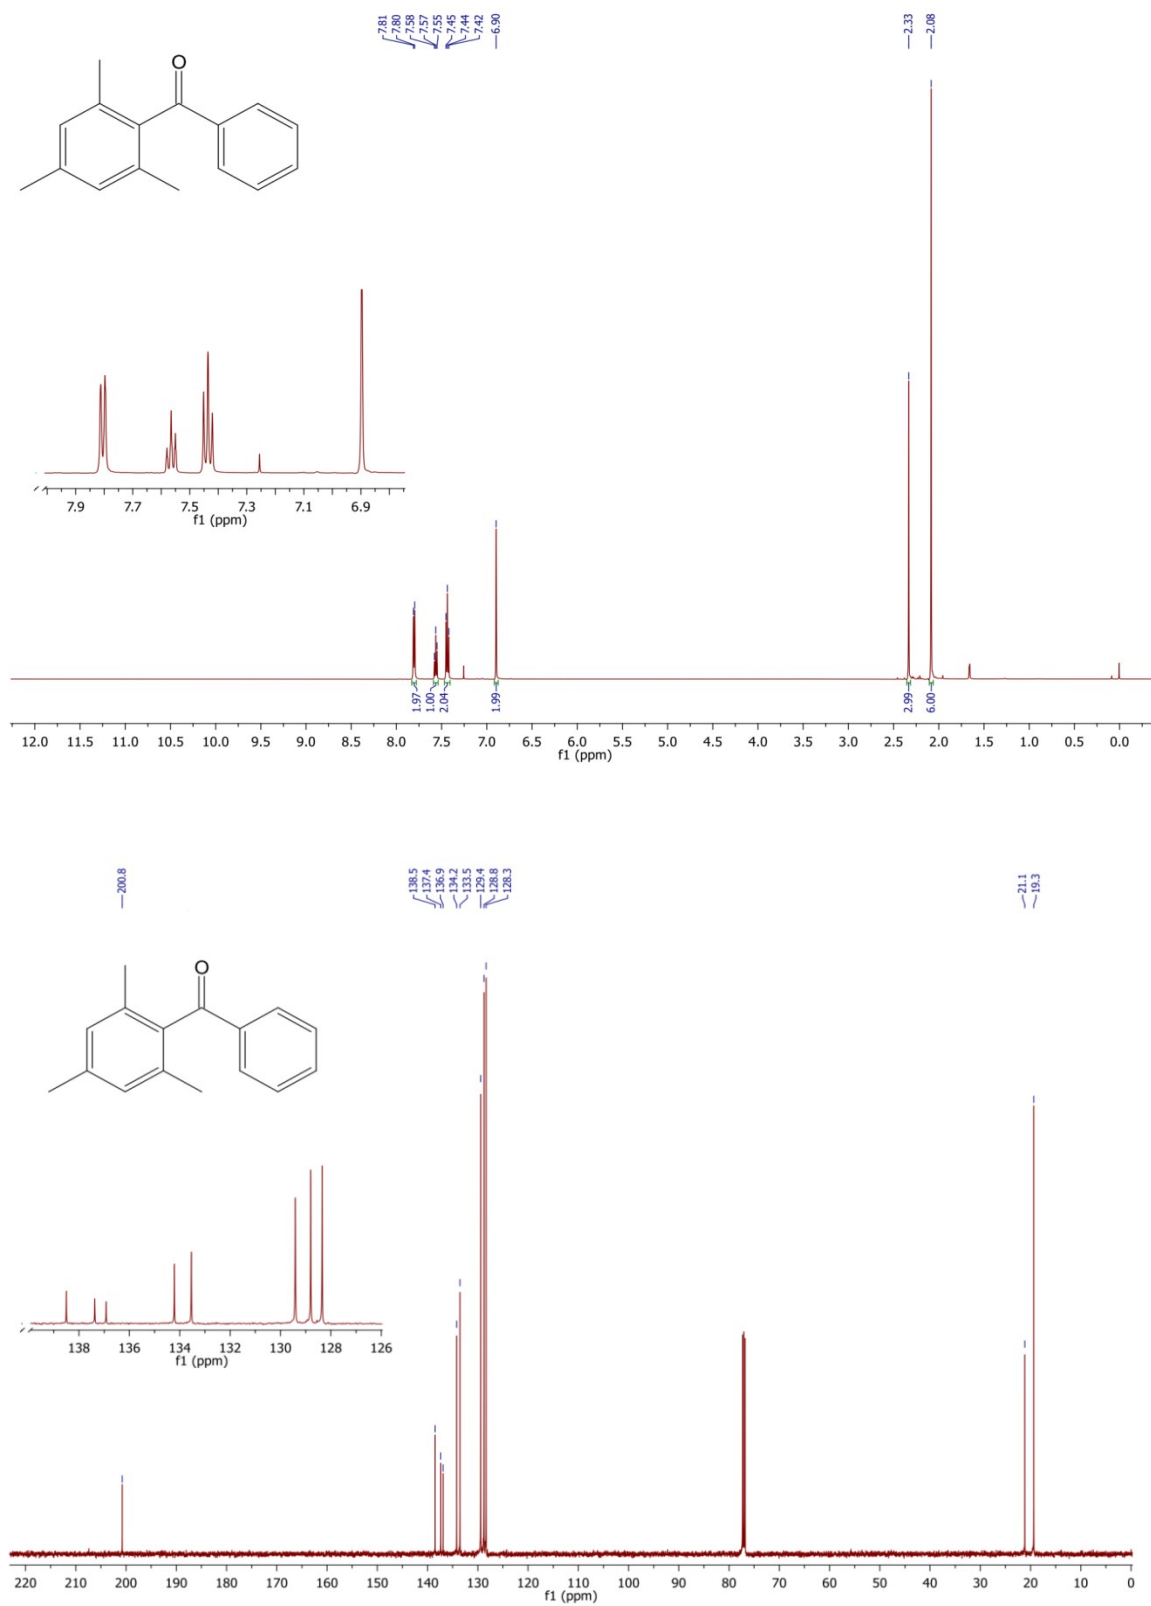

**Figure S15.**  $^1\text{H}$  and  $^{13}\text{C}$  NMR of 2,4,6-trimethylbenzophenone.

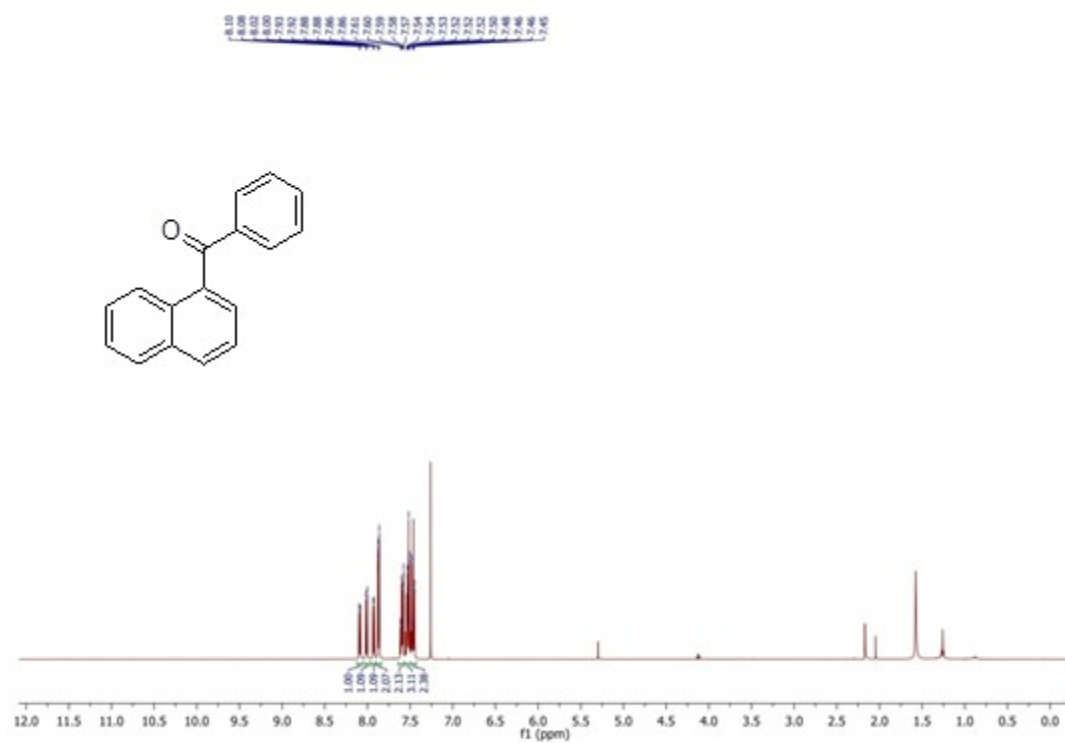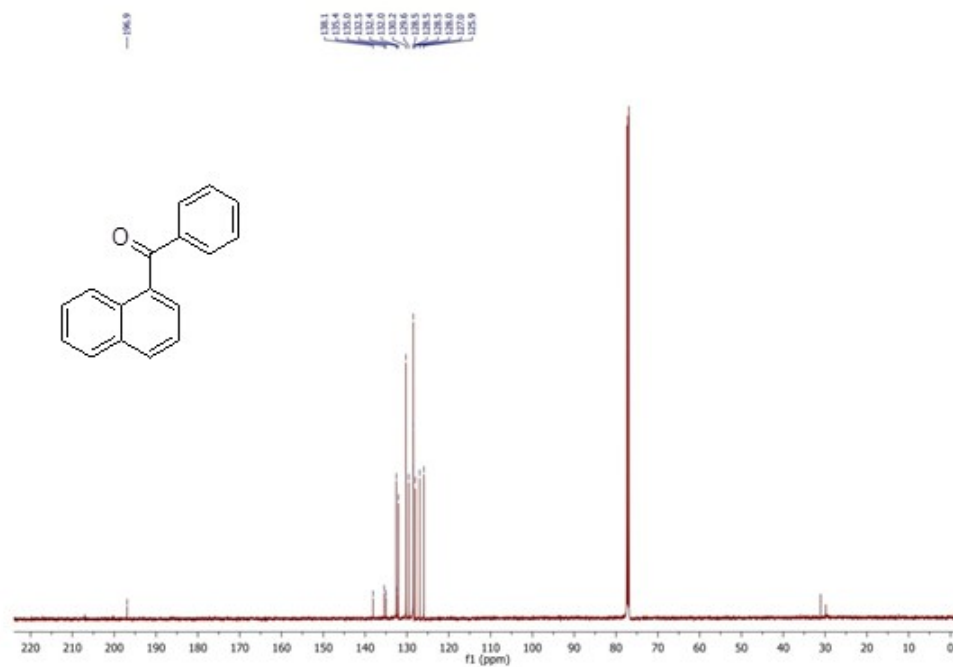

**Figure S16.** <sup>1</sup>H and <sup>13</sup>C NMR of 1-benzoylnaphthalene.

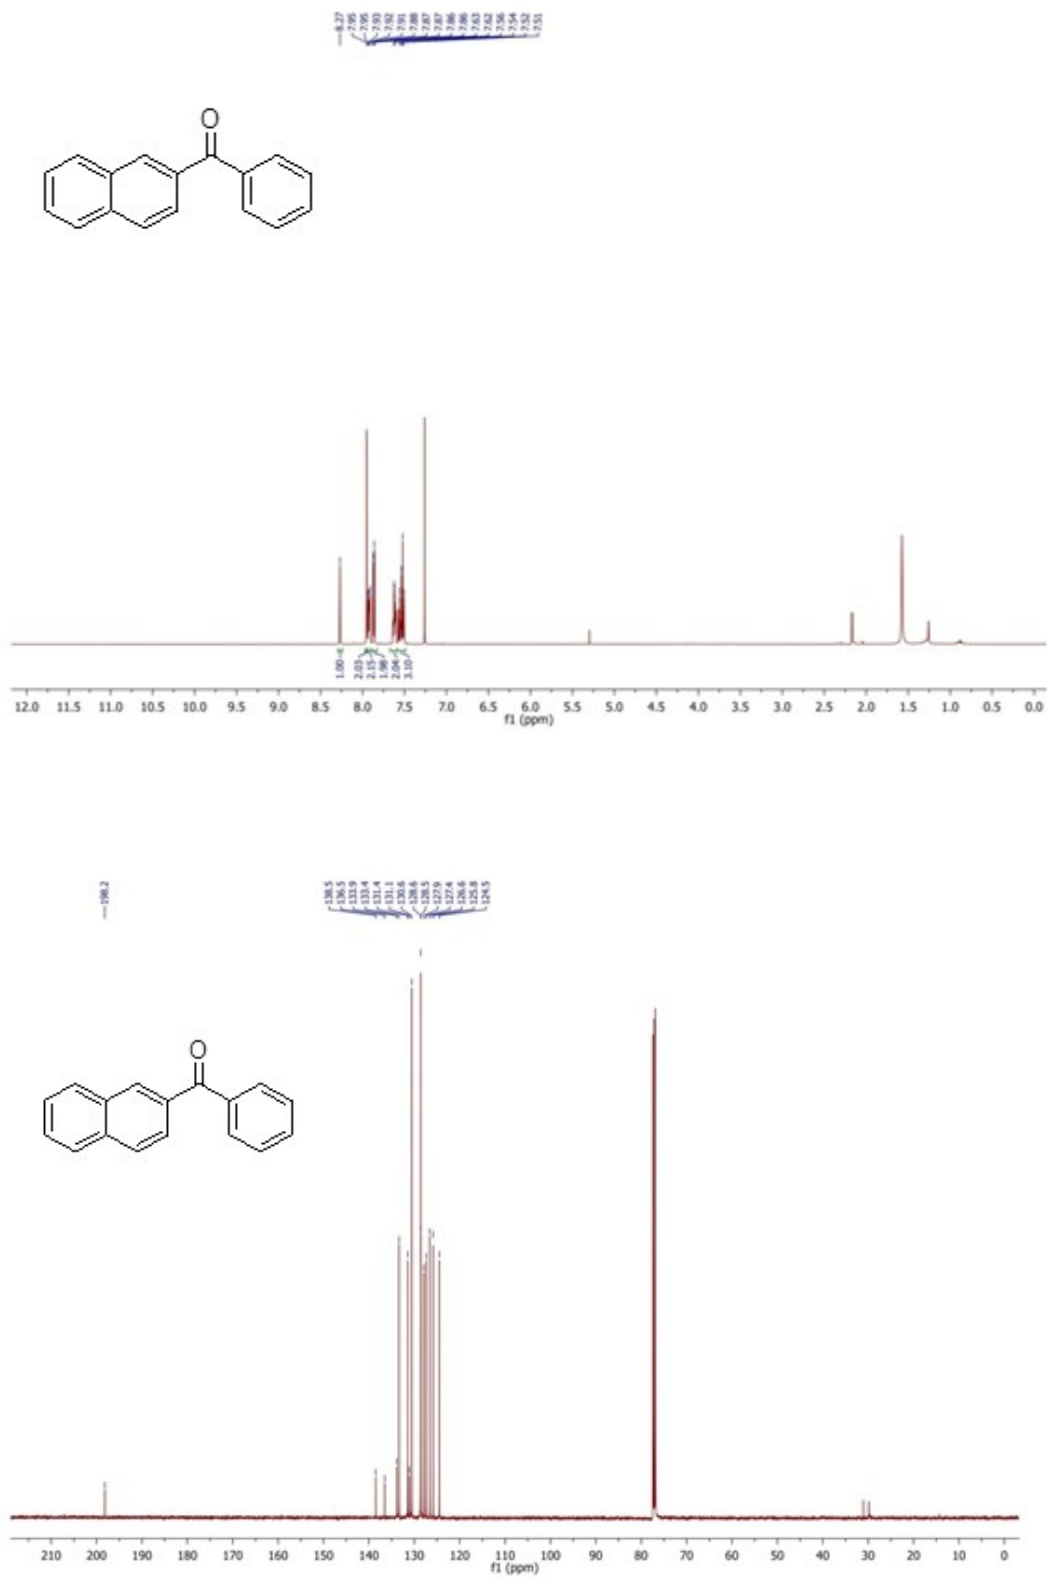

**Figure S17.**  $^1\text{H}$  and  $^{13}\text{C}$  NMR of 2-benzoylnaphthalene.

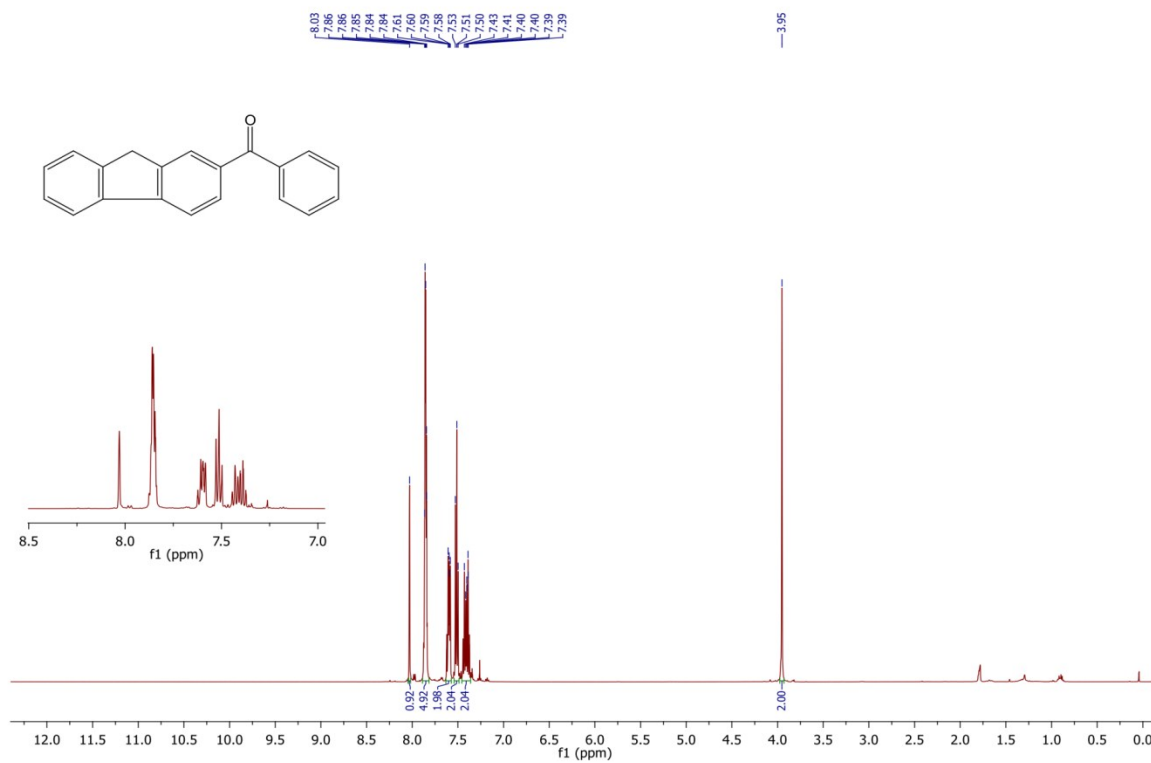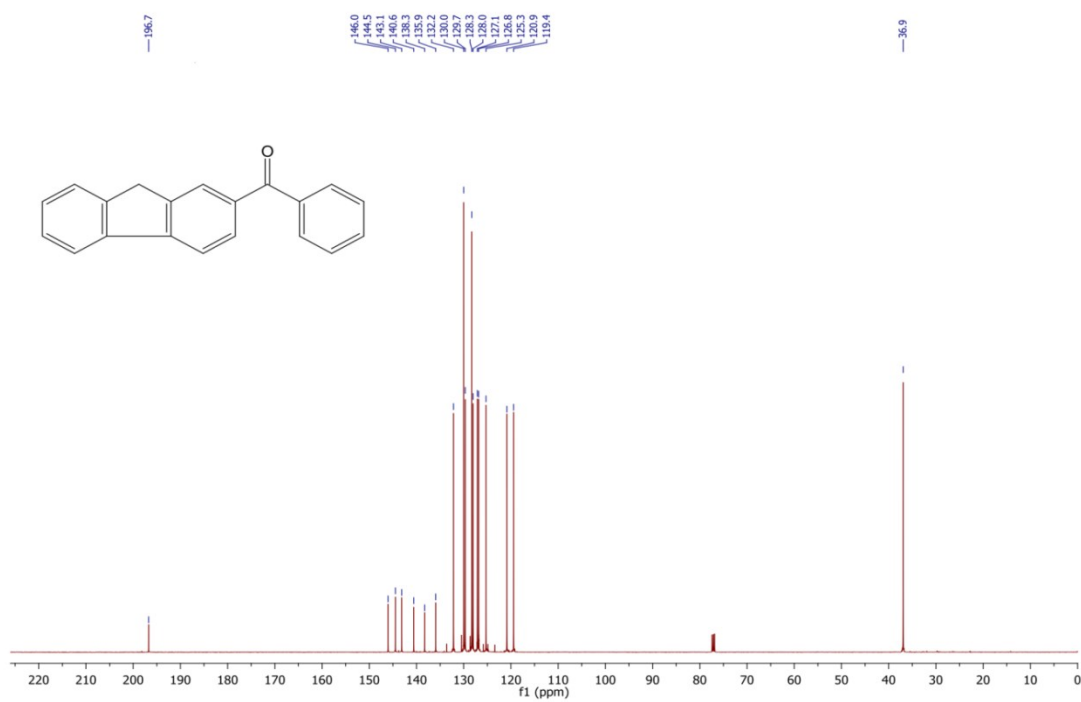

**Figure S18.** <sup>1</sup>H and <sup>13</sup>C NMR of 2-benzoylfluorene.

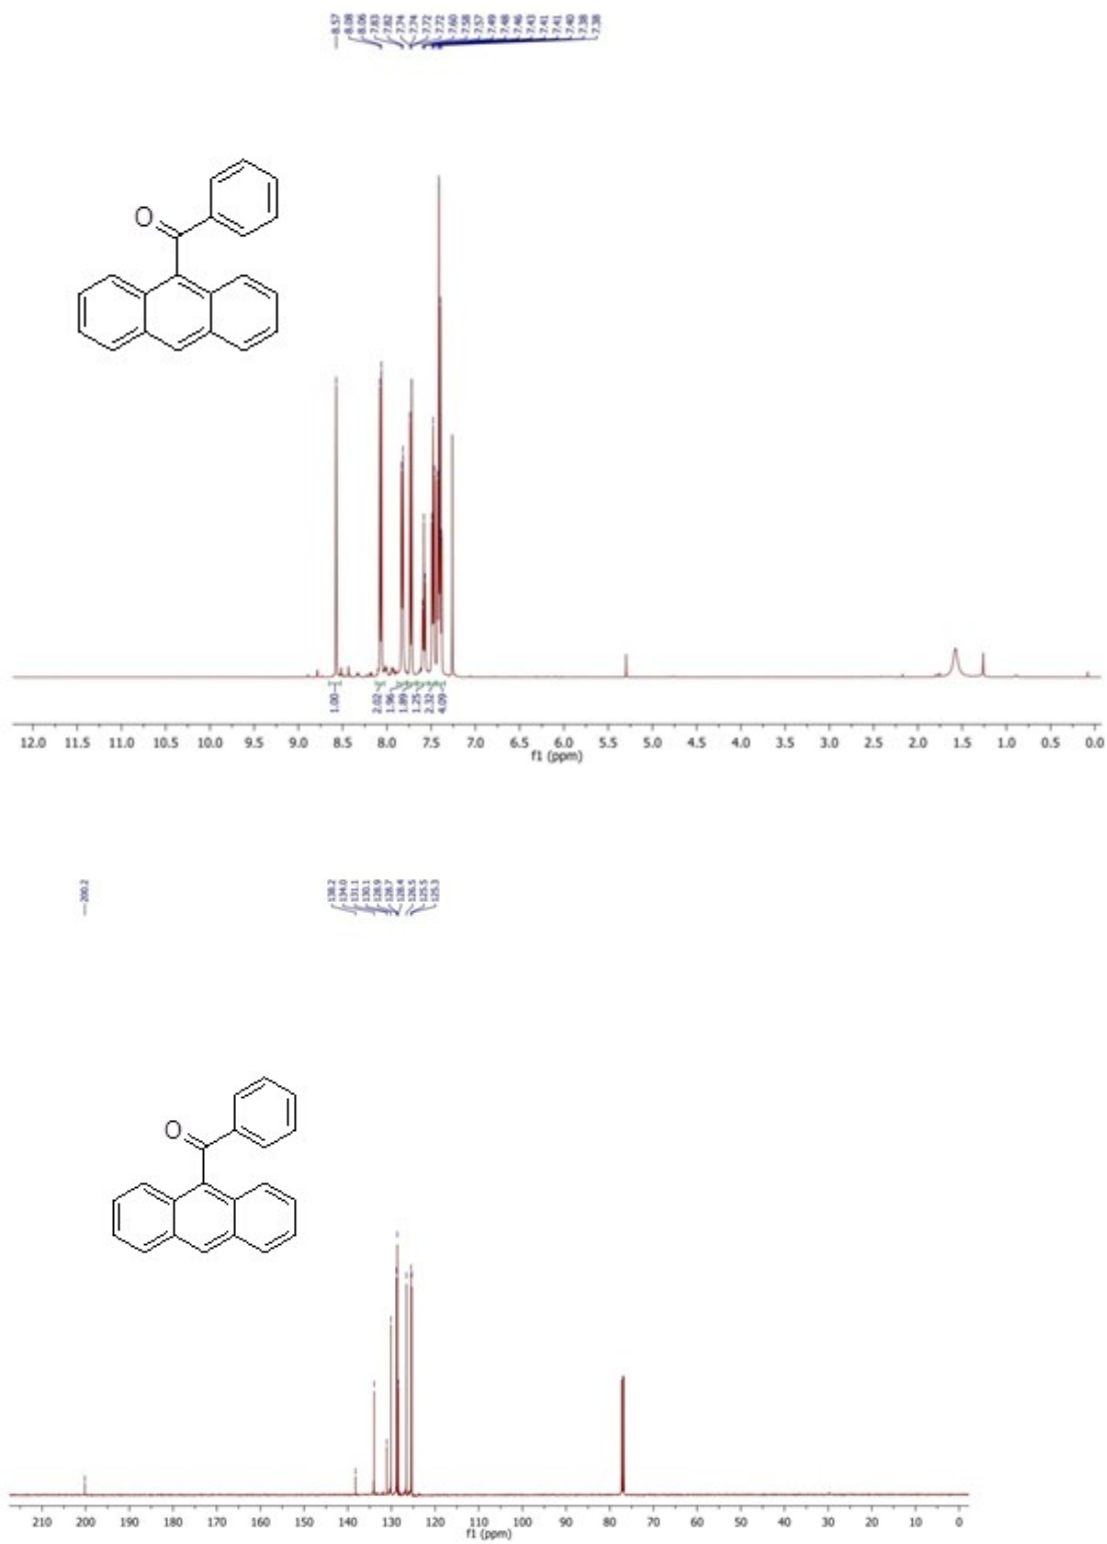

## Reference

1. T. L. H. Doan, H. L. Nguyen, H. Q. Pham, N.-N. Pham-Tran, T. N. Le and K. E. Cordova, *Chem. Asian J.*, 2015, **10**, 2660-2668.
2. (a) J. H. Cavka, S. Jakobsen, U. Olsbye, N. Guillou, C. Lamberti, S. Bordiga and K. P. Lillerud, *J. Am. Chem. Soc.*, 2008, **130**, 13850-13851; (b) A. Schaate, P. Roy, A. Godt, J. Lippke, F. Waltz, M. Wiebcke and P. Behrens, *Chem. Eur. J.*, 2011, **17**, 6643-6651.
